# Supplementary material
Source: Research Square preprint supplement (doi:10.21203/rs.3.rs-9012088/v1)
Supplement: Supplementary file 1 [file 65acea568886ae607cb32503.docx]

[1] using the effsize package in R.

**Fig. S1 |** **Technical aspects of eDNA removal.** **A** Standard curve for the PMA-treatment in mock communities of live and dead *Pseudomonas stutzeri* inoculated into switchgrass soil (*Panicum virgatum,* variety “Cave-in-Rock”). Points show the average eDNA (%) in each mock community regressed against the expected eDNA (%), error bars show the standard error of the mean and the dashed line corresponds to x=y (n=3 soil replicates and n=3 qPCR replicates). **B** Average number of 16S rRNA gene copies in the PMA-treated (red circles) and untreated soil (black triangles) samples across the time series for corn and switchgrass soil with the error bars showing the standard error (Corn n=46 and Switchgrass n=47). **C** The average number of 16S rRNA gene copies across the 3 technical replicates (n=3 qPCR replicates) for each PMA-treated and untreated soil sample. The corresponding point in the time series and its crop type are shown below the plot. Two samples that fell outside the standard curve were removed and are highlighted in gray (-60% eDNA). Red asterisks indicate a PMA-treated technical replicate was removed and a black asterisk indicate an untreated technical replicate was removed.


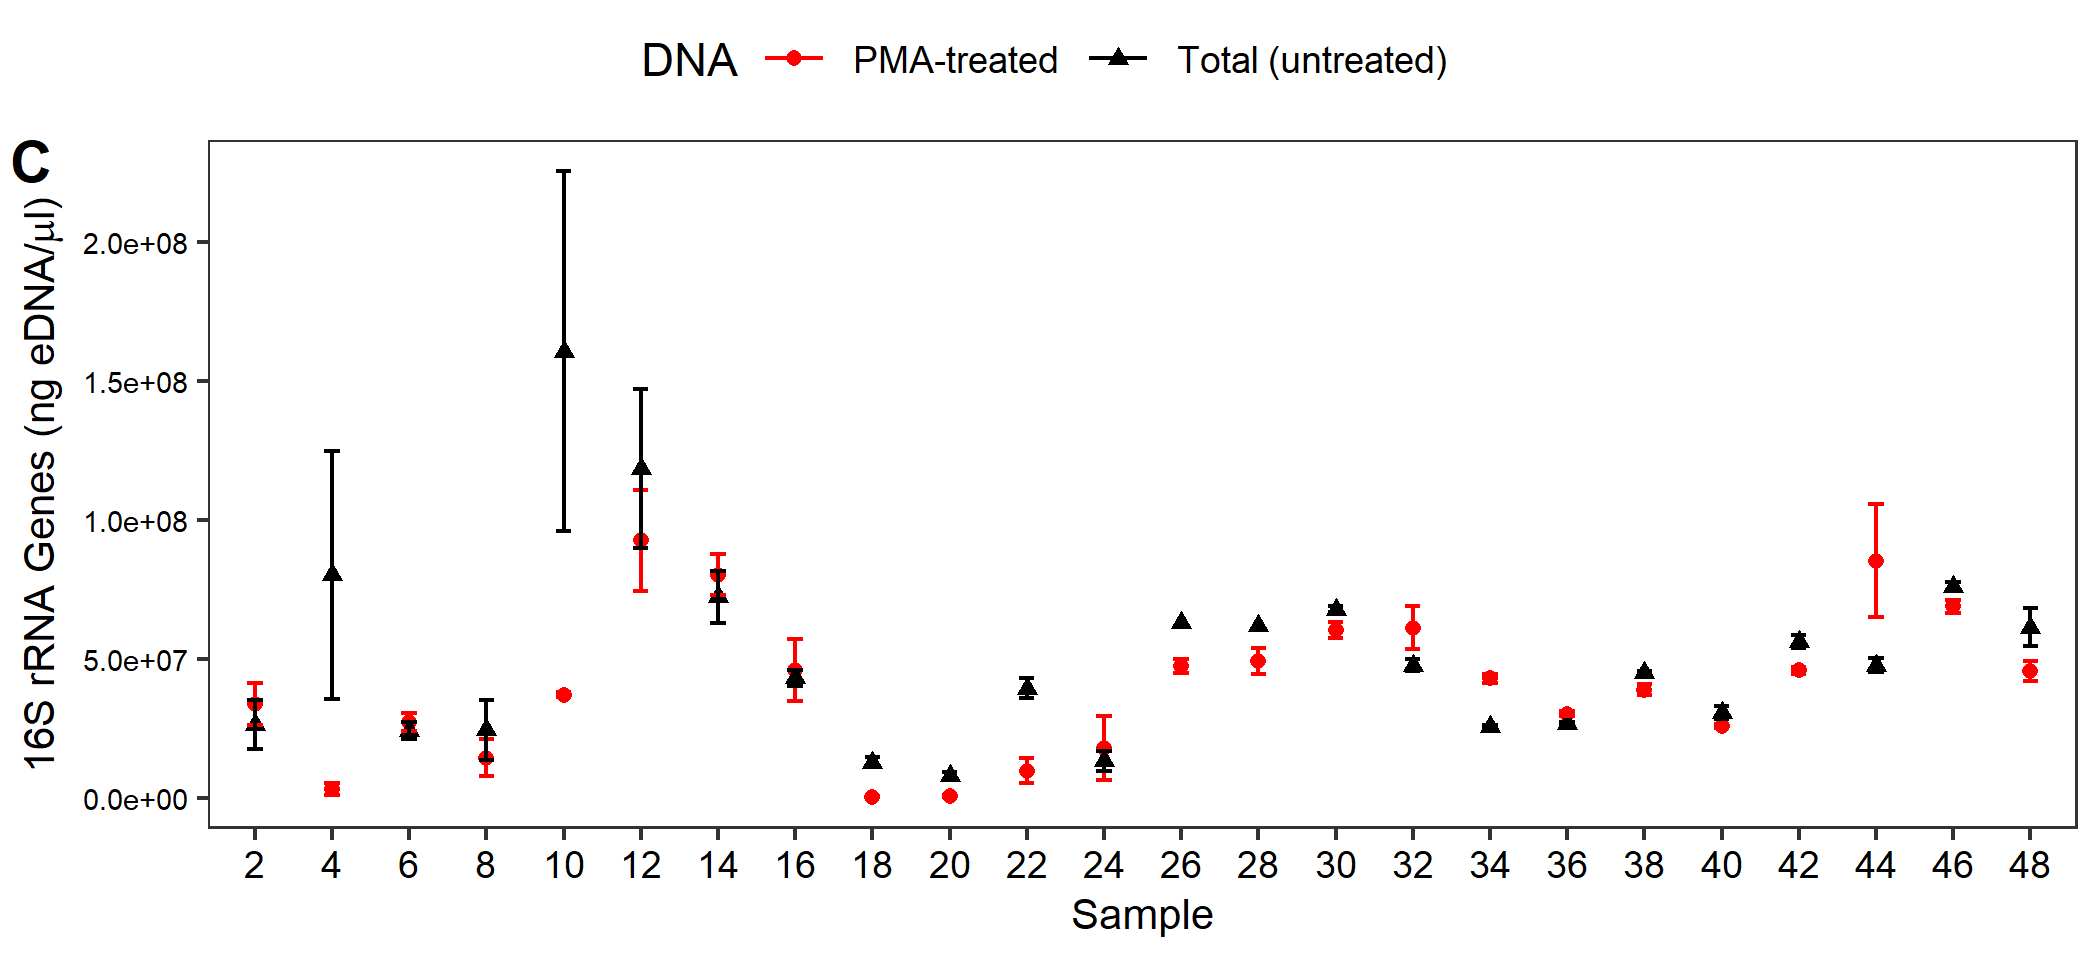

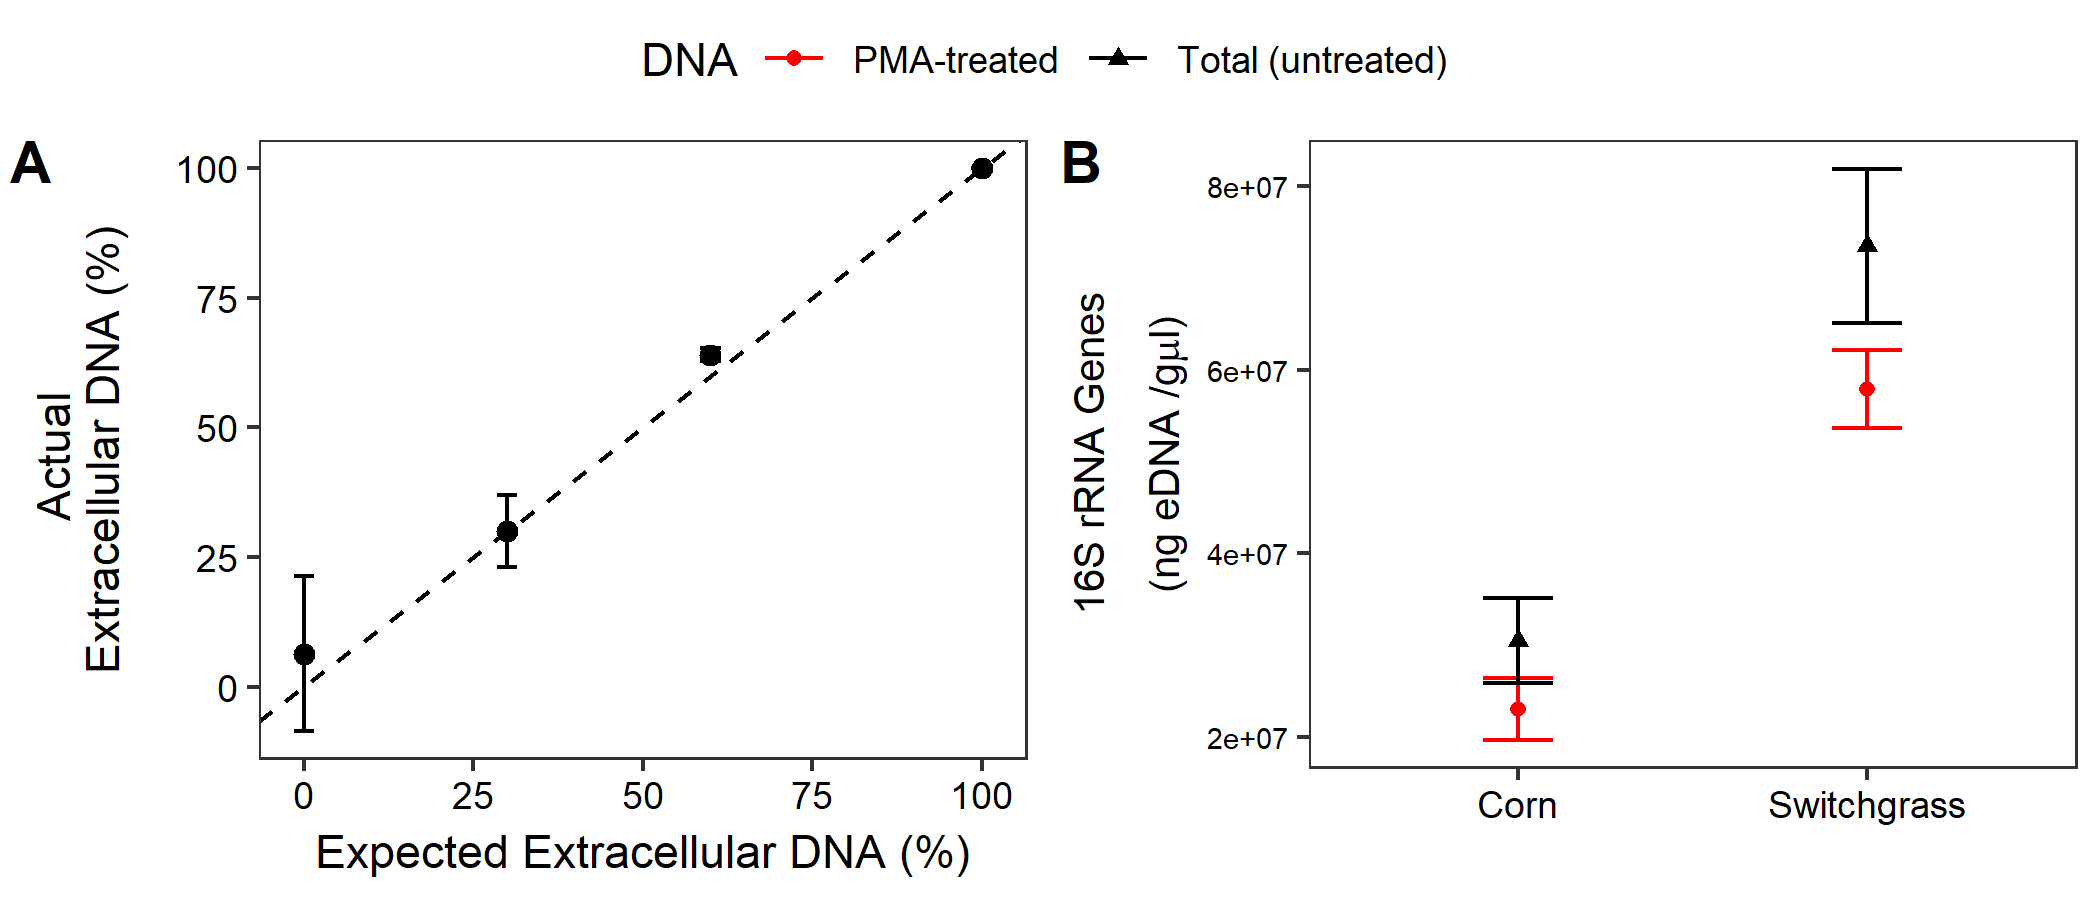

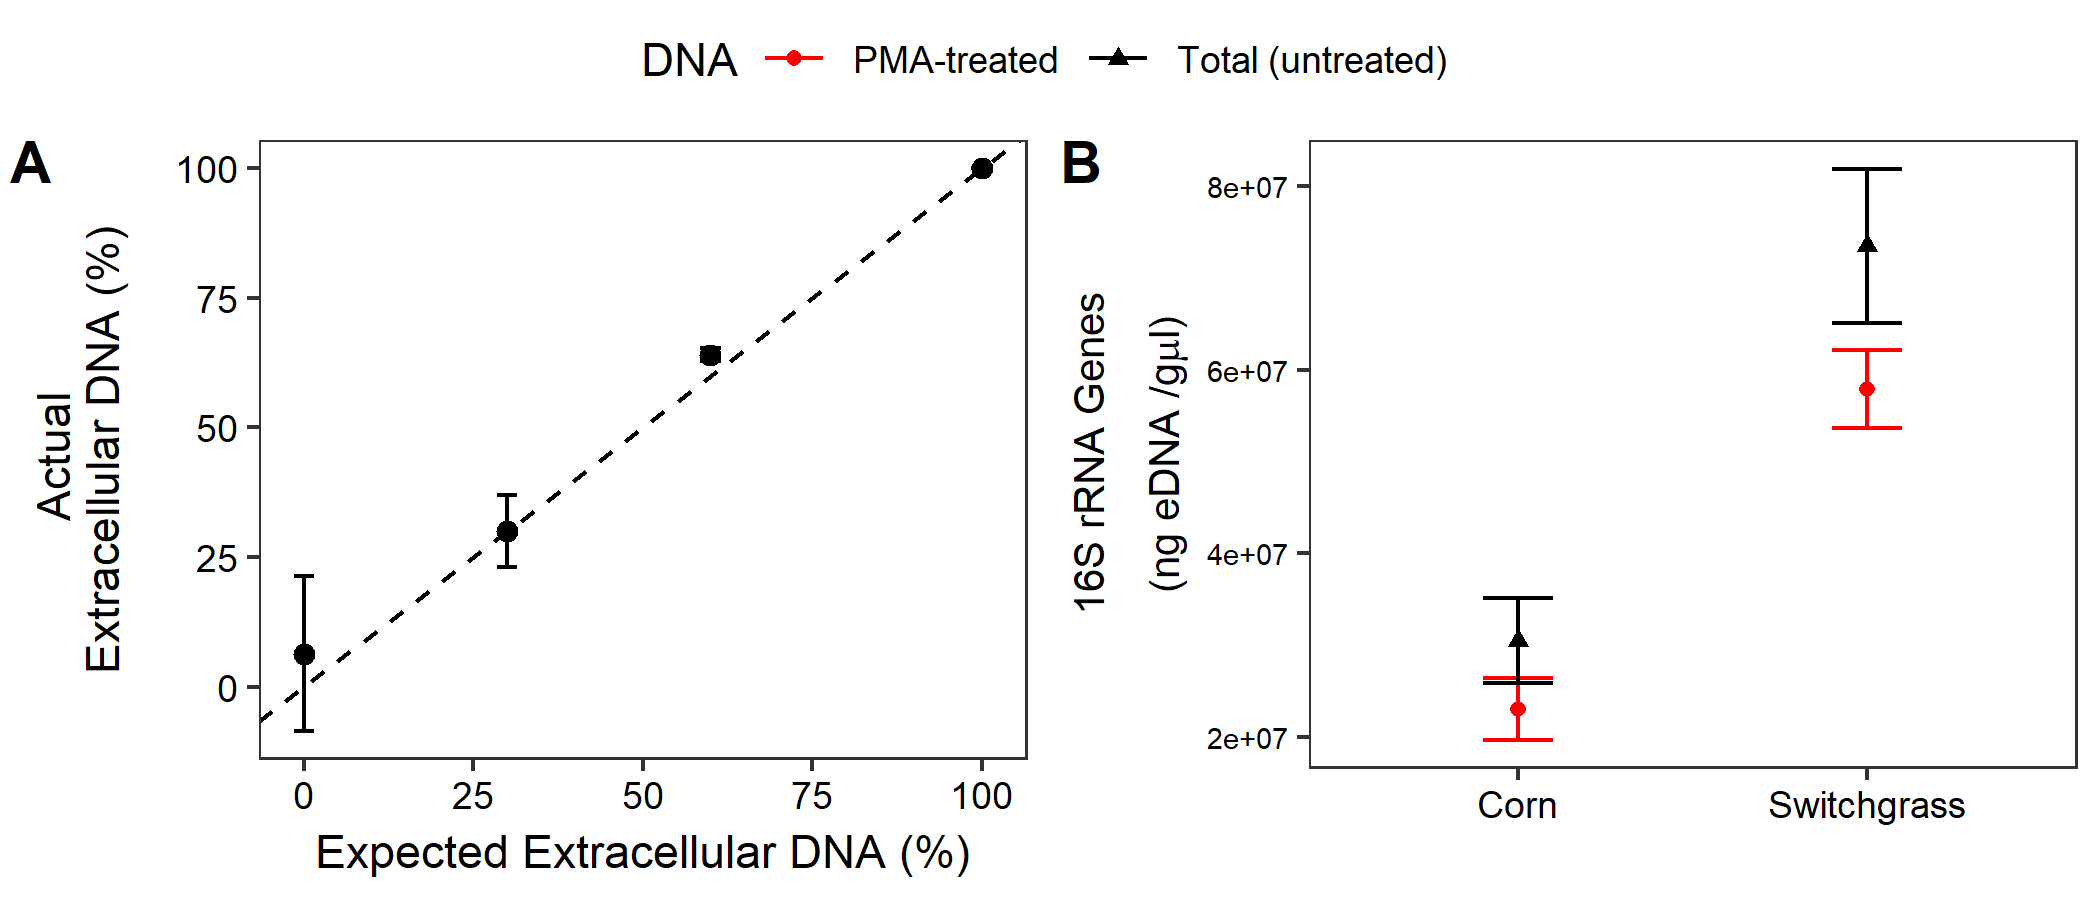

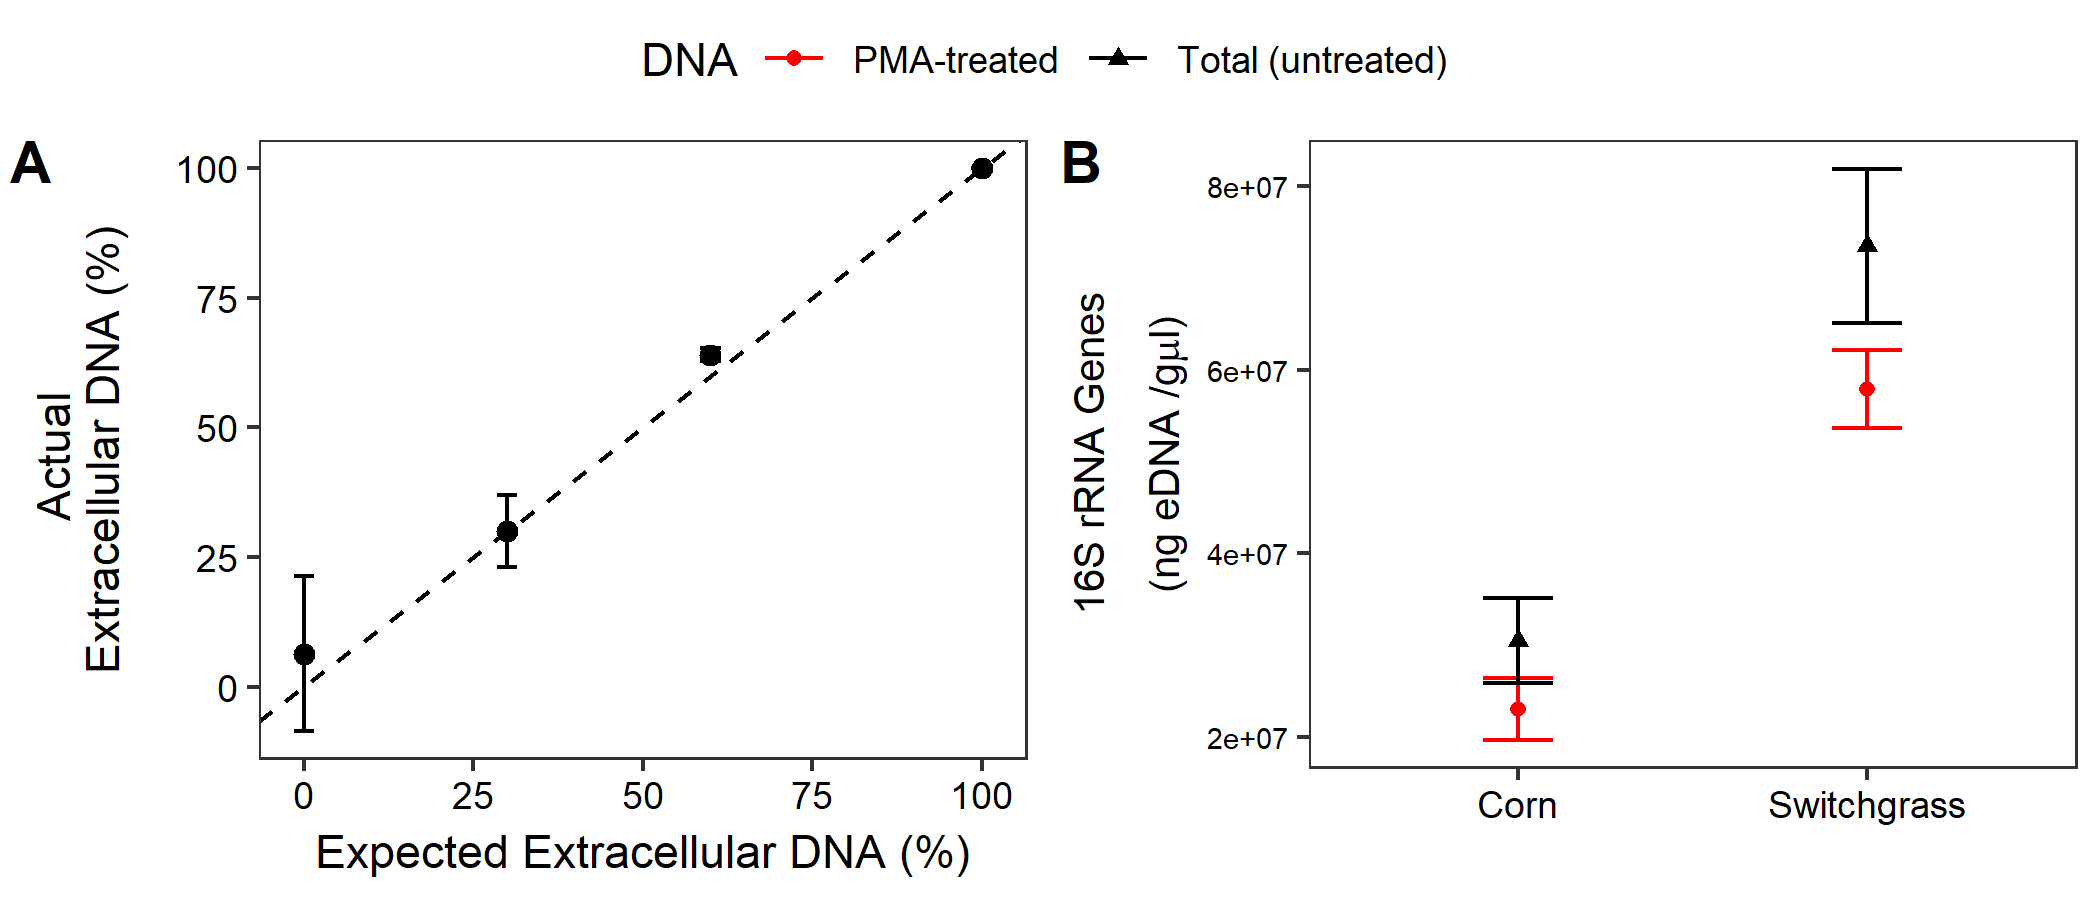

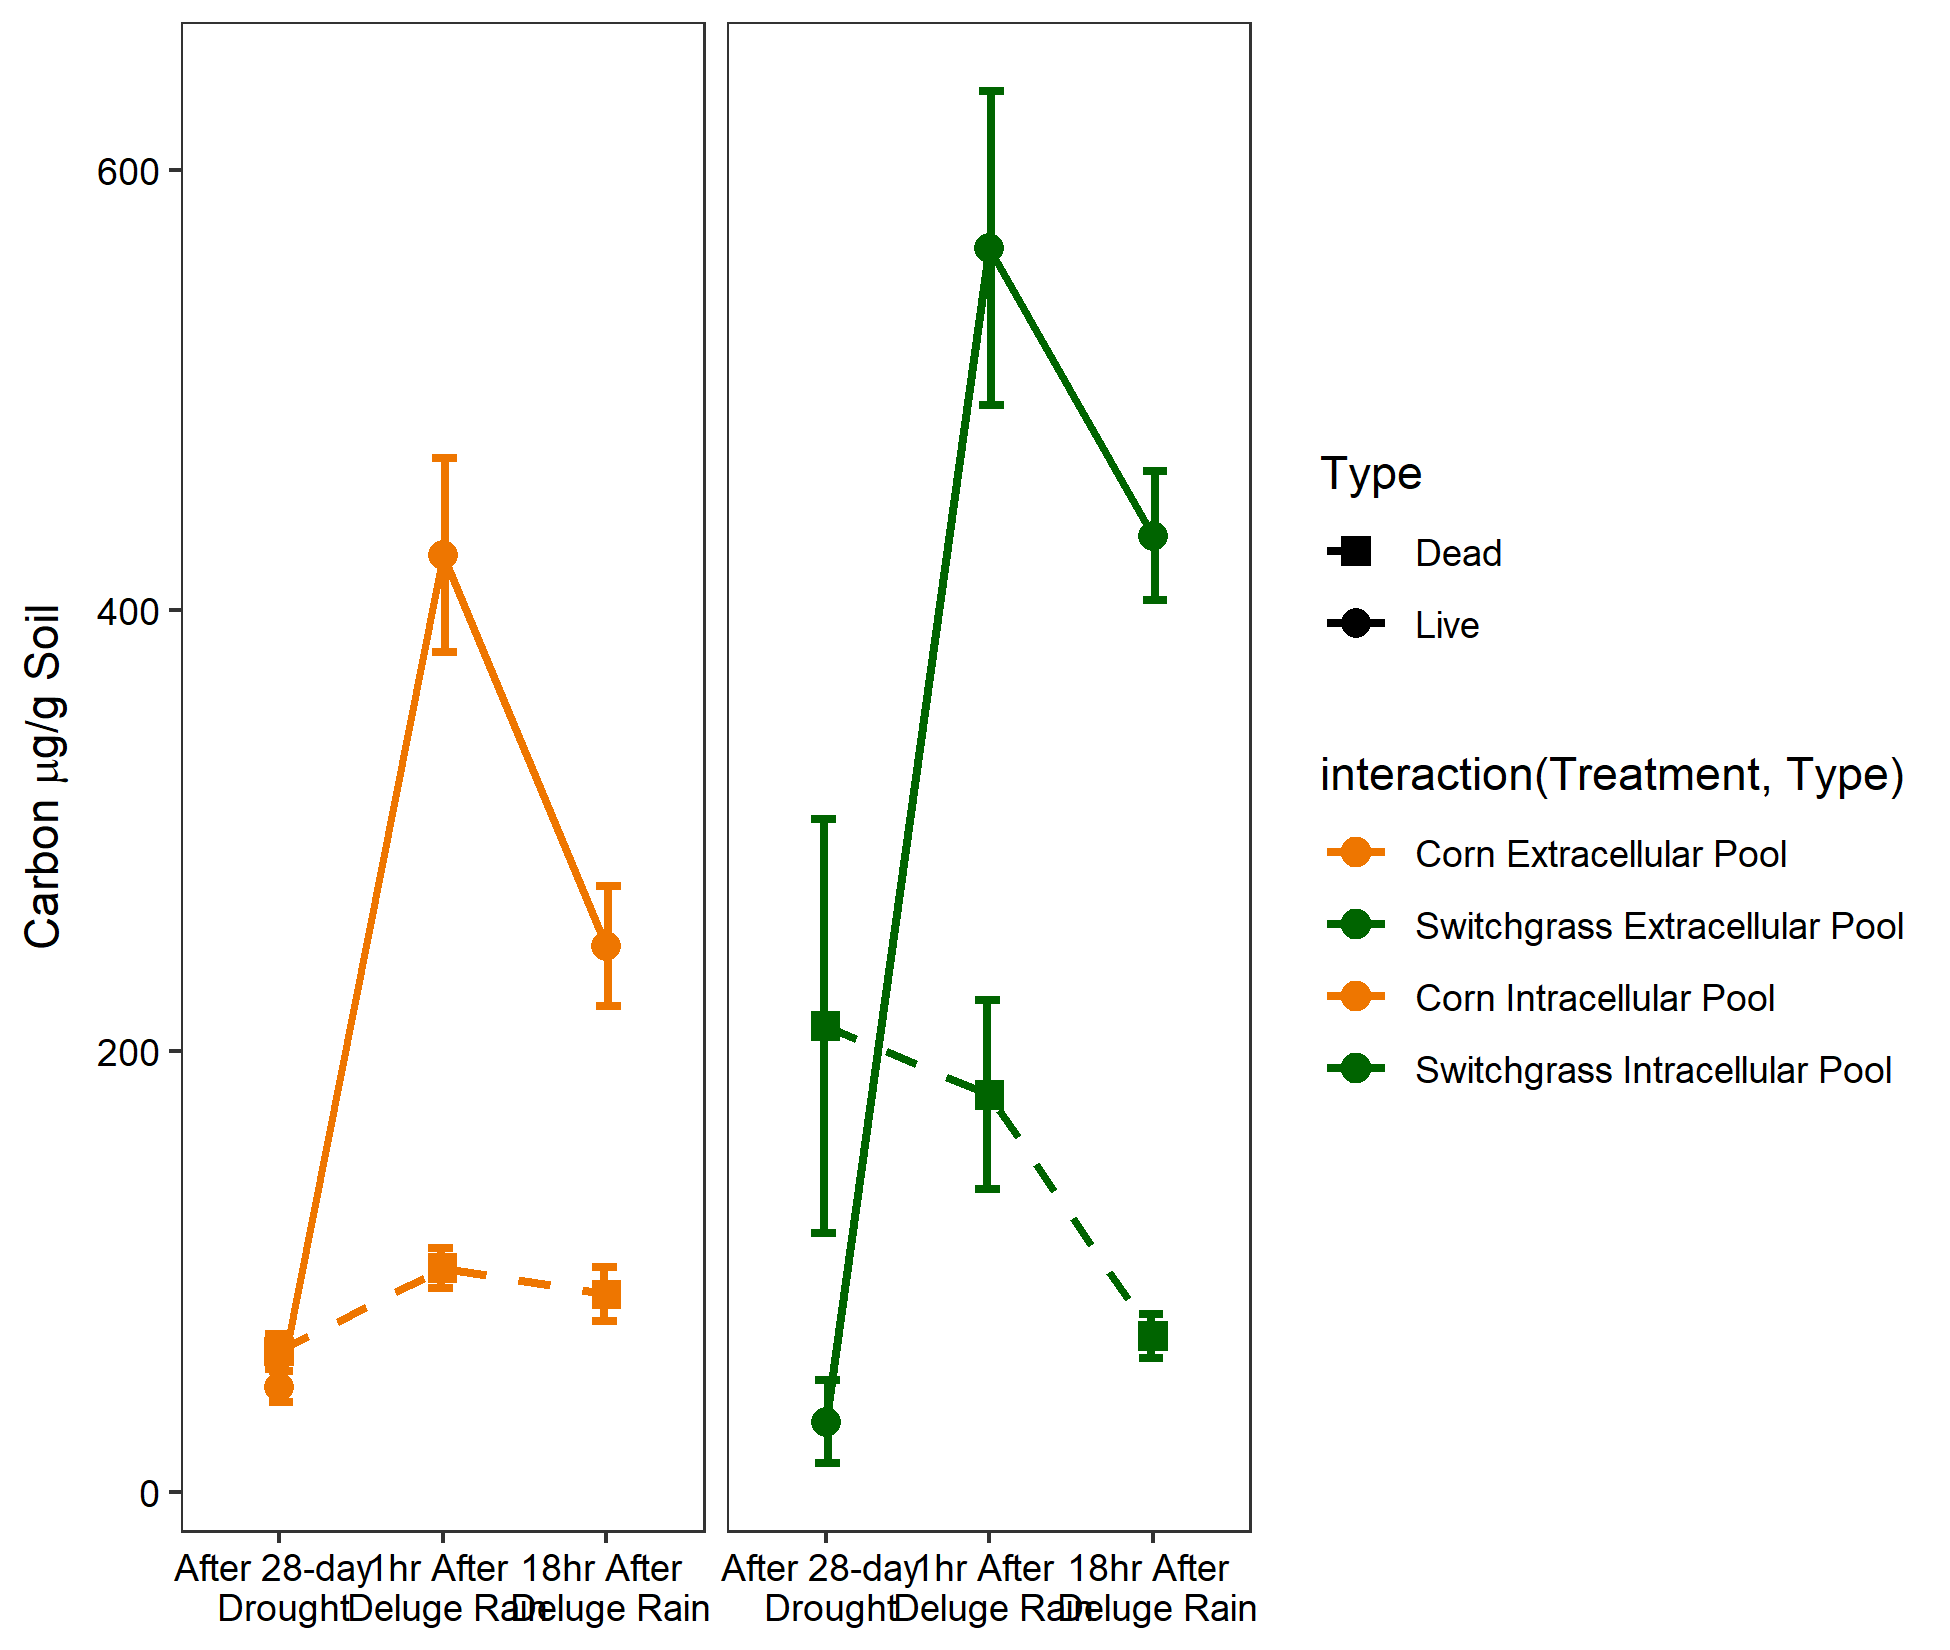

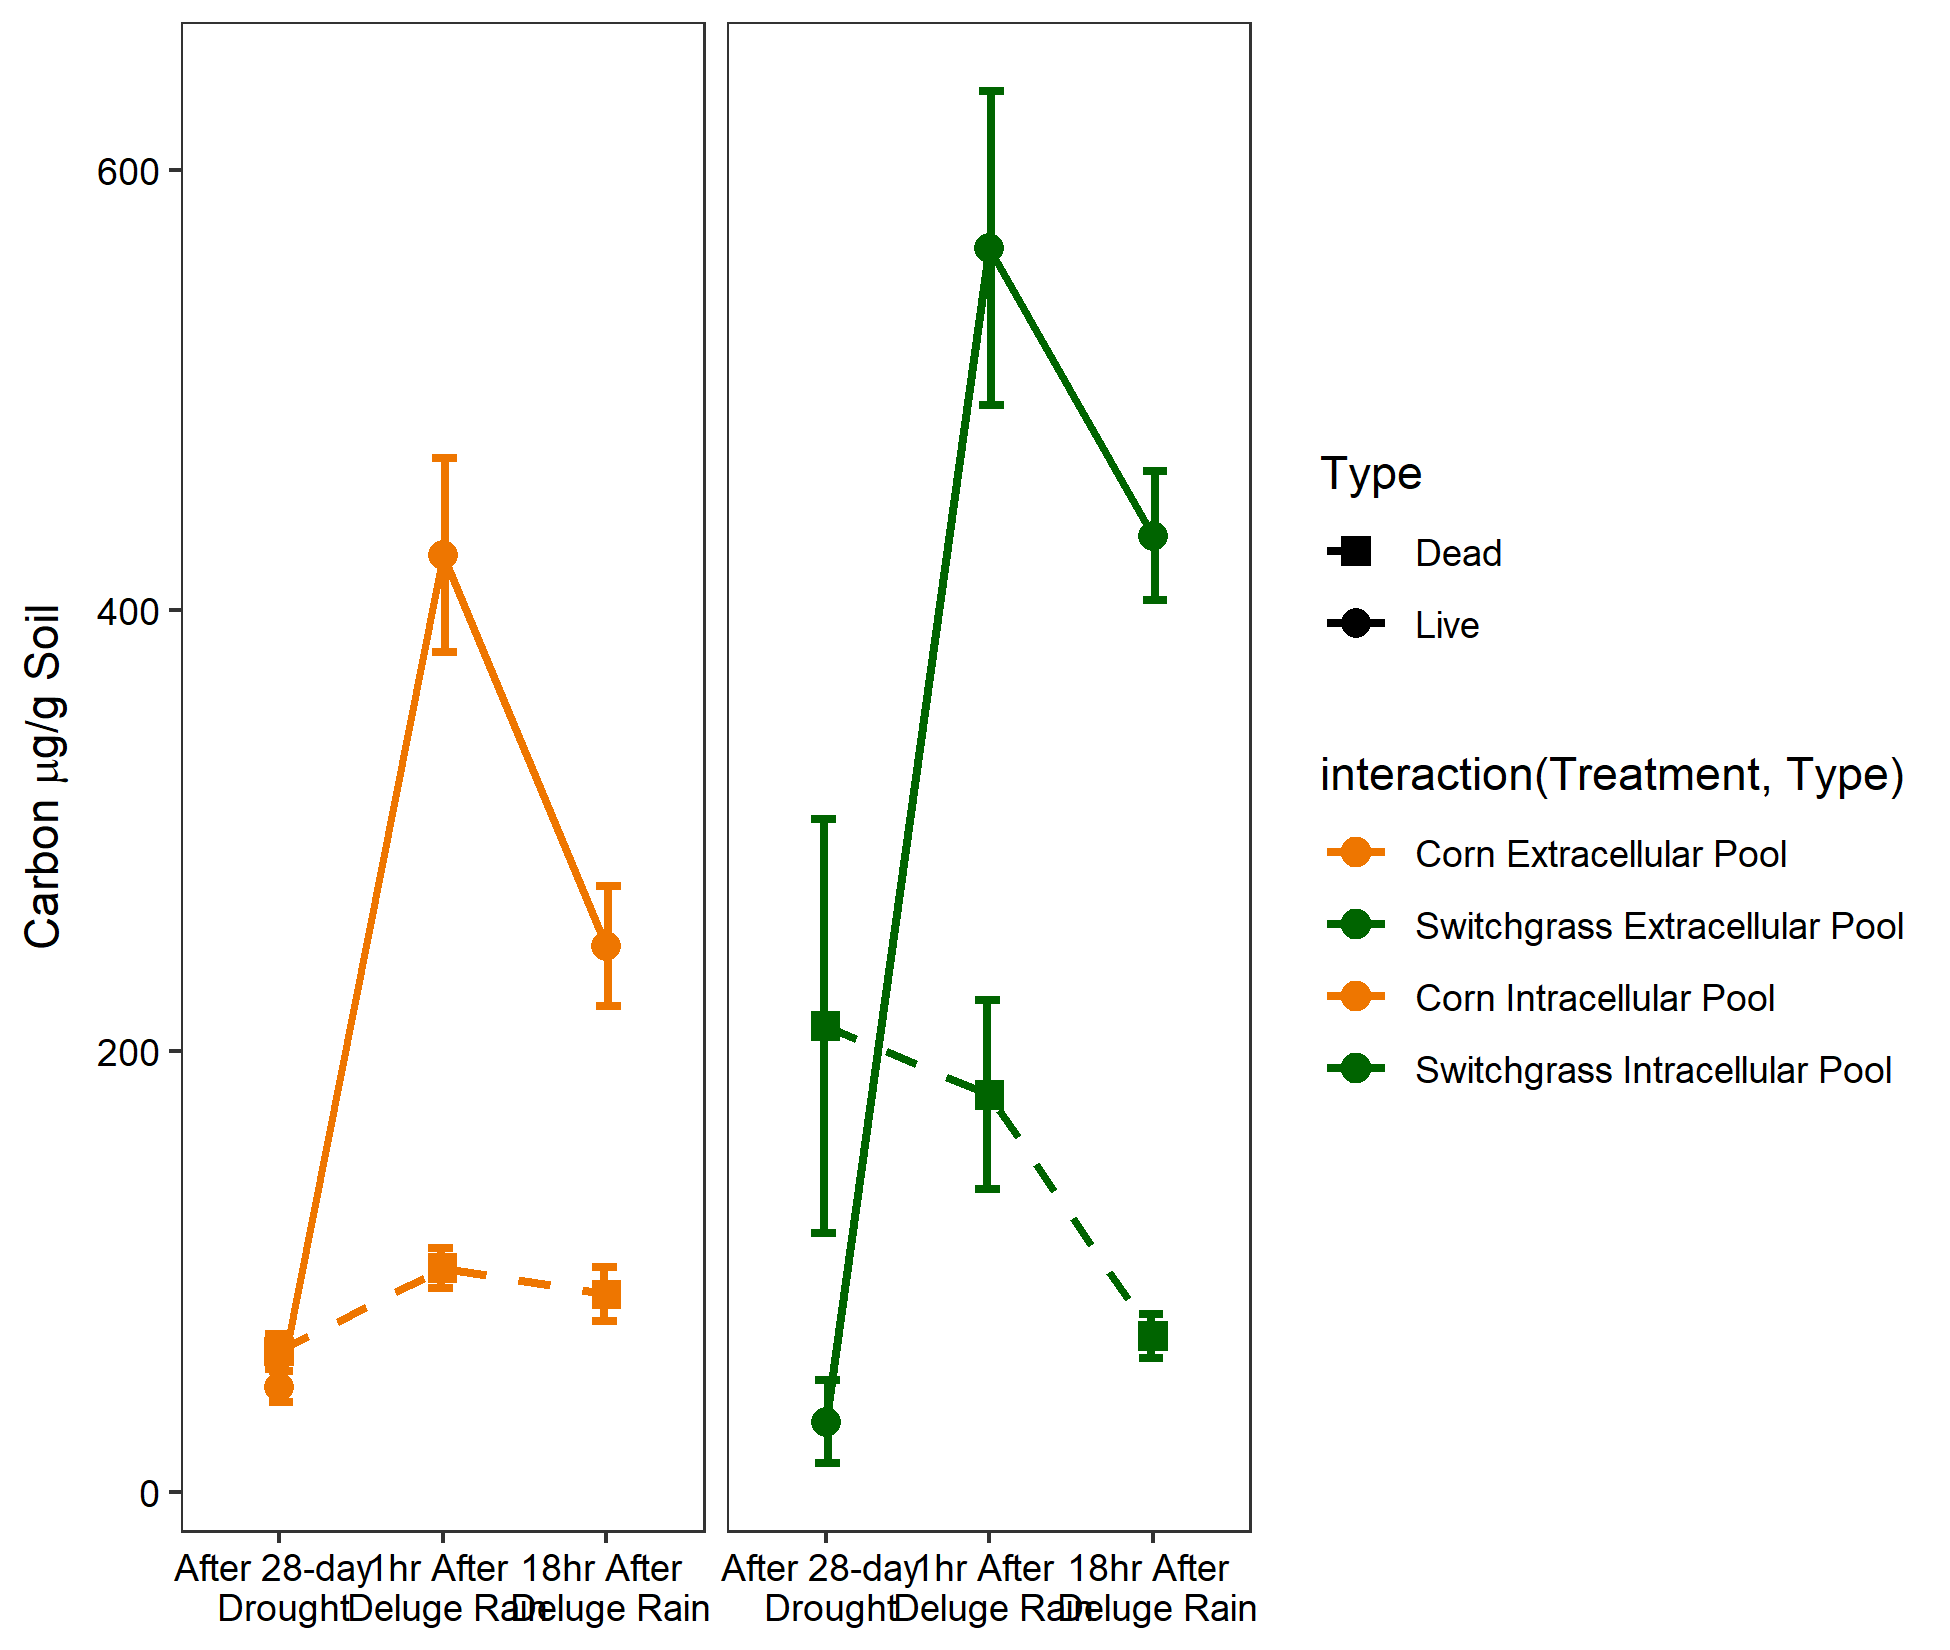

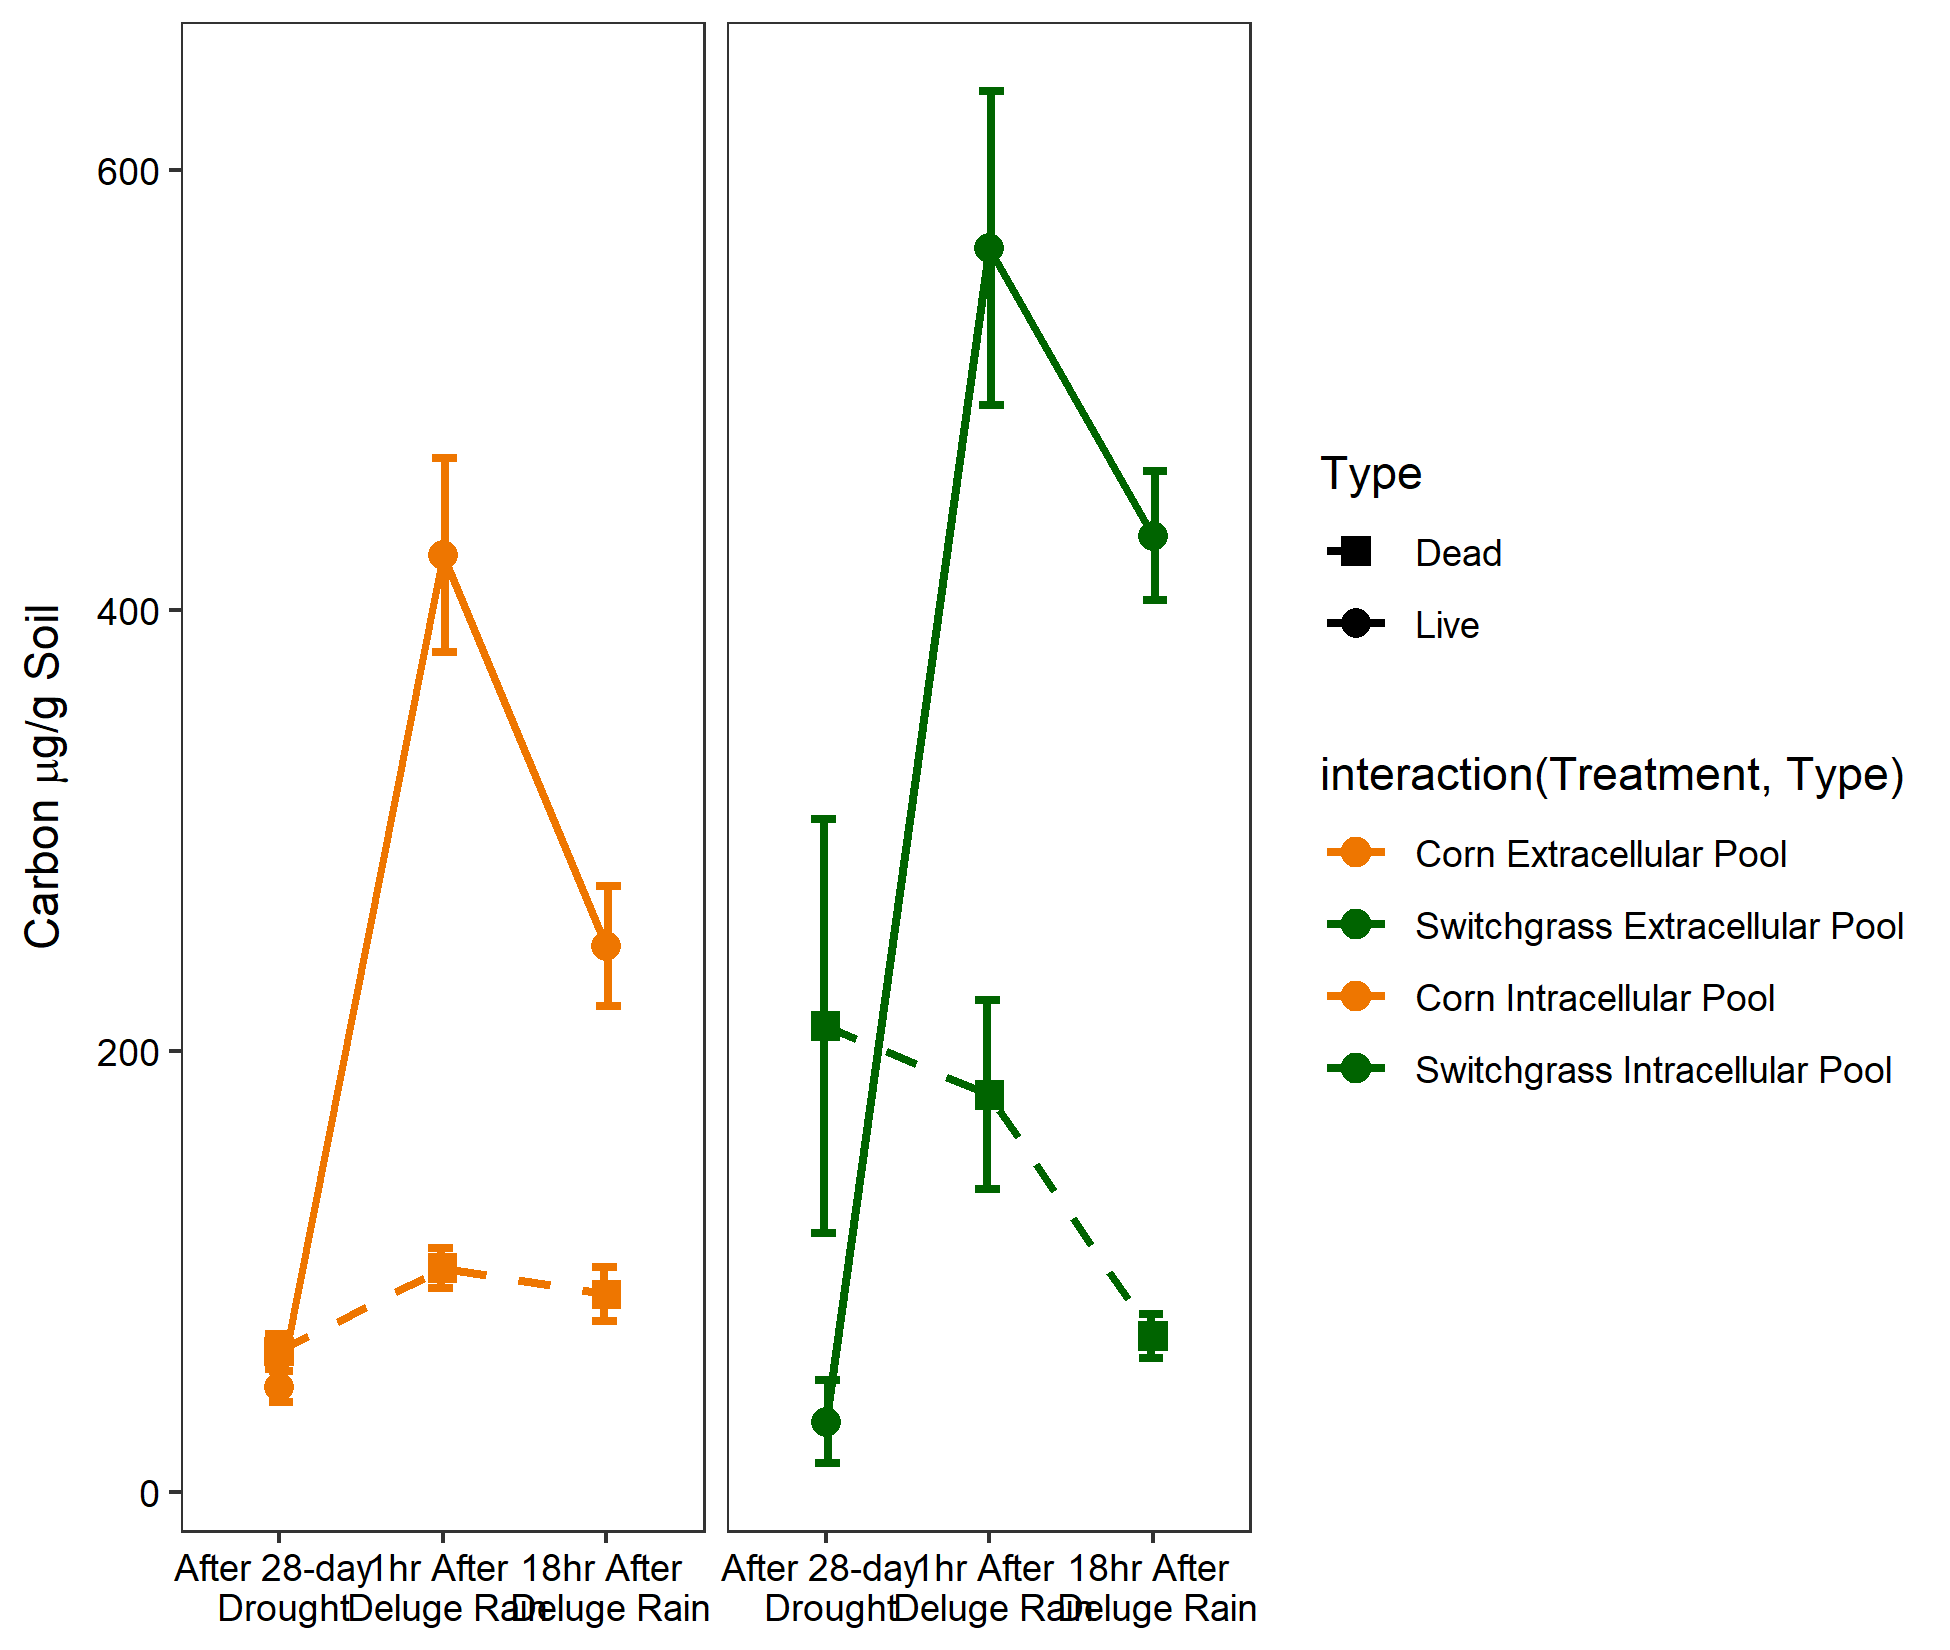

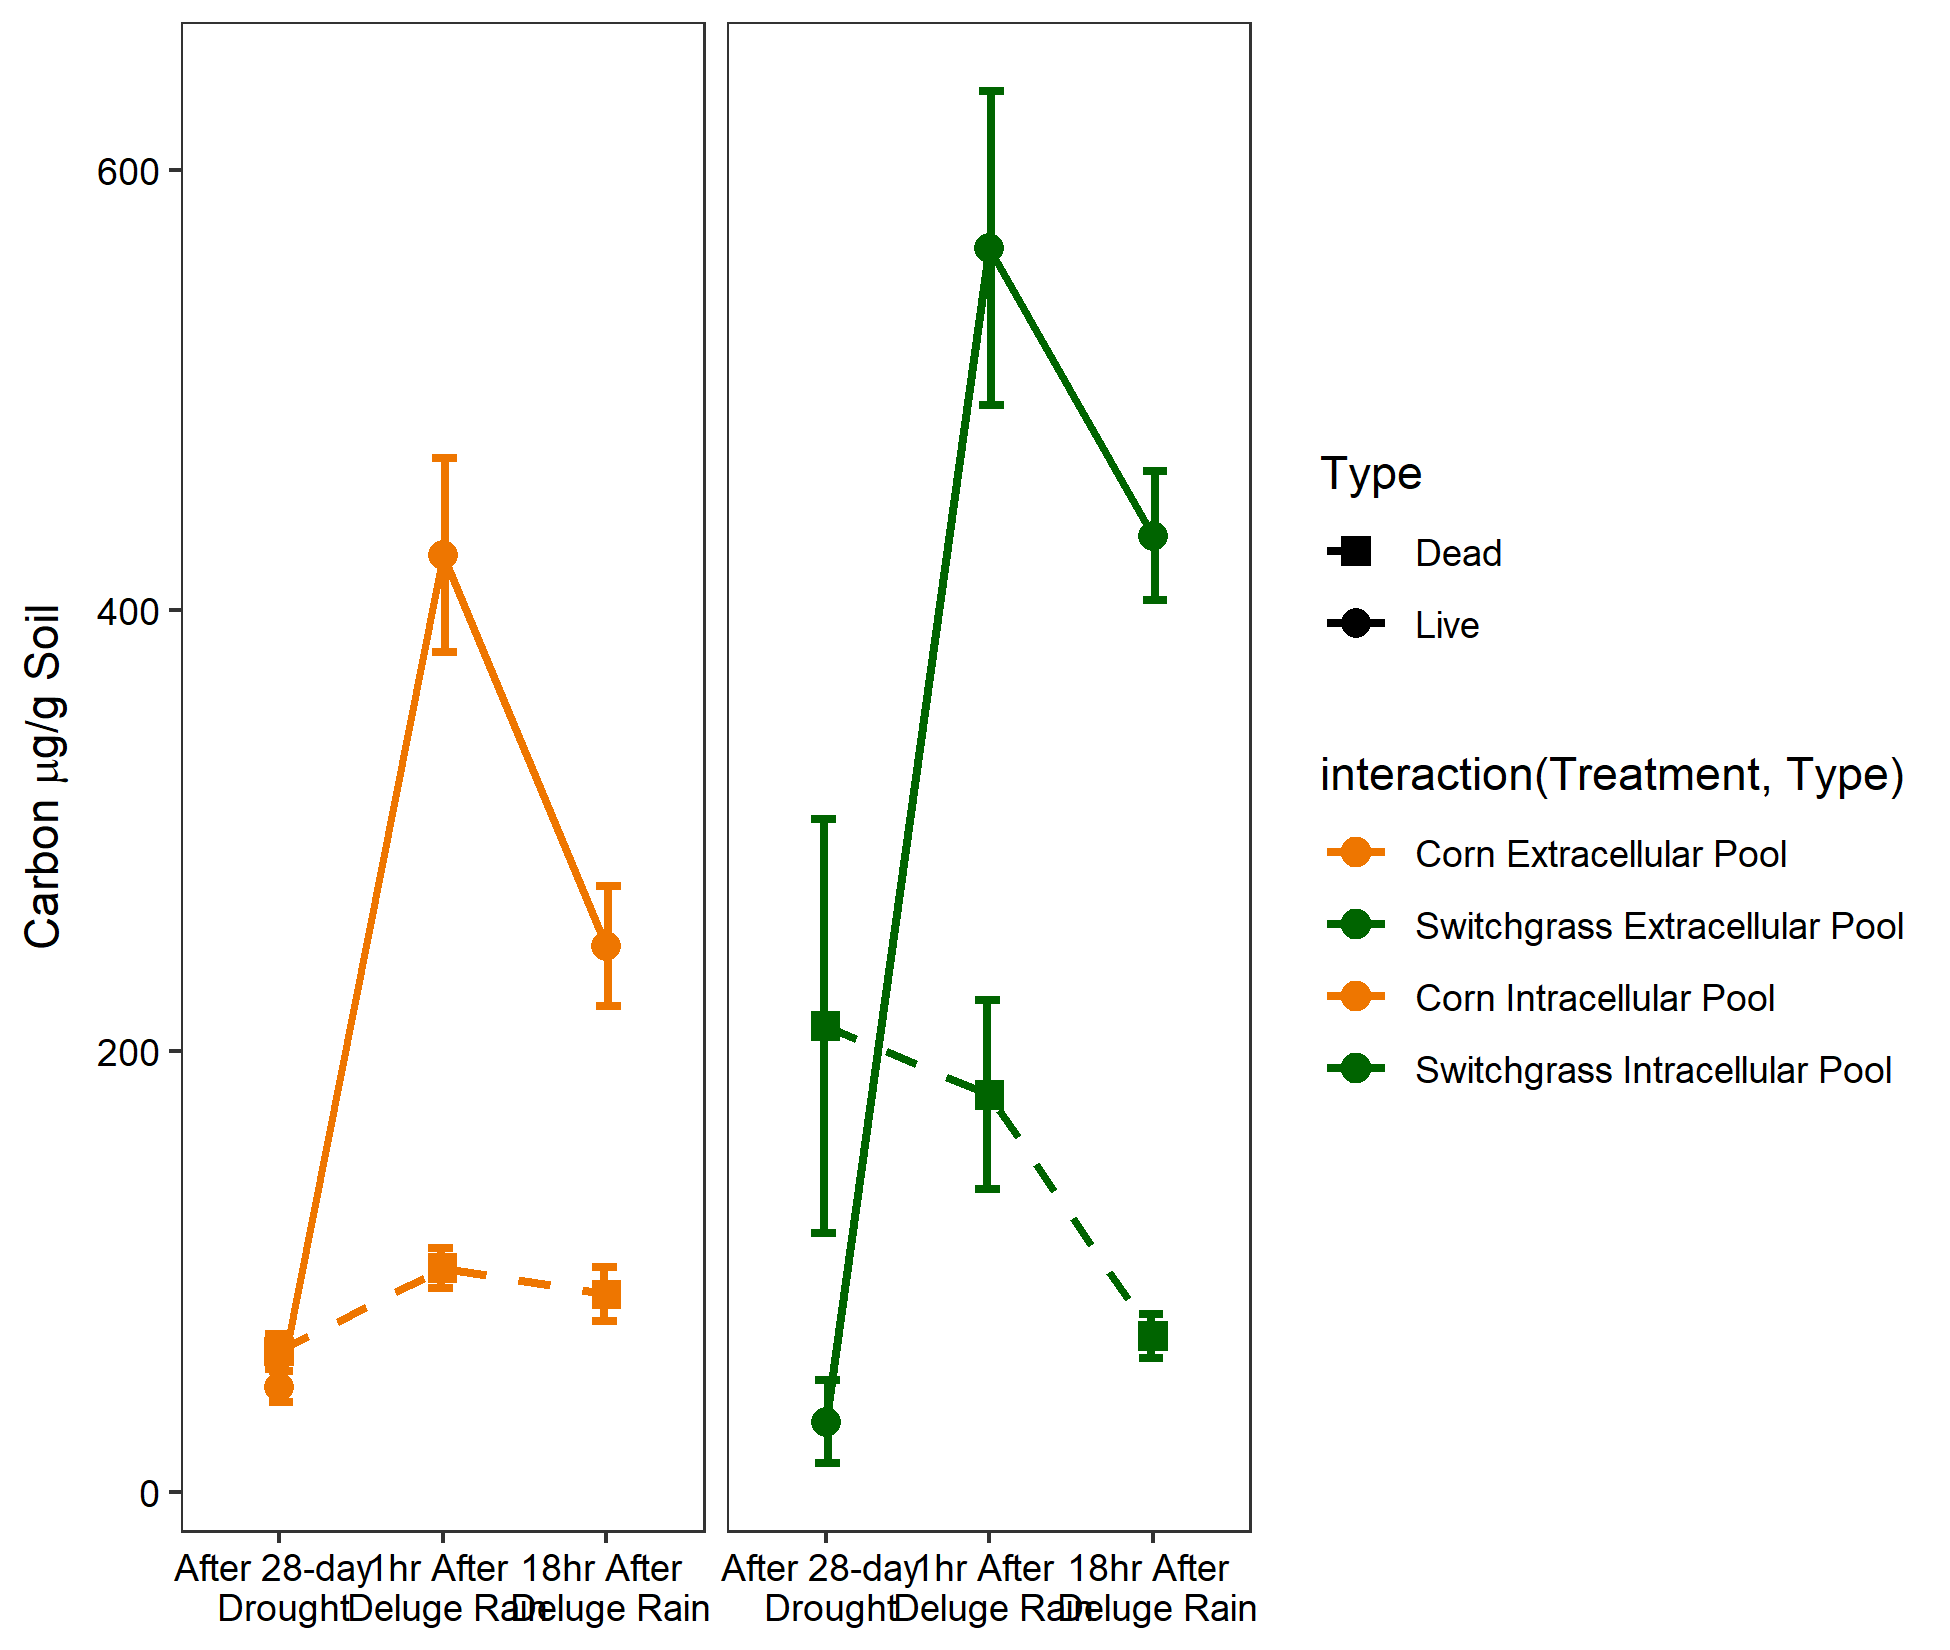

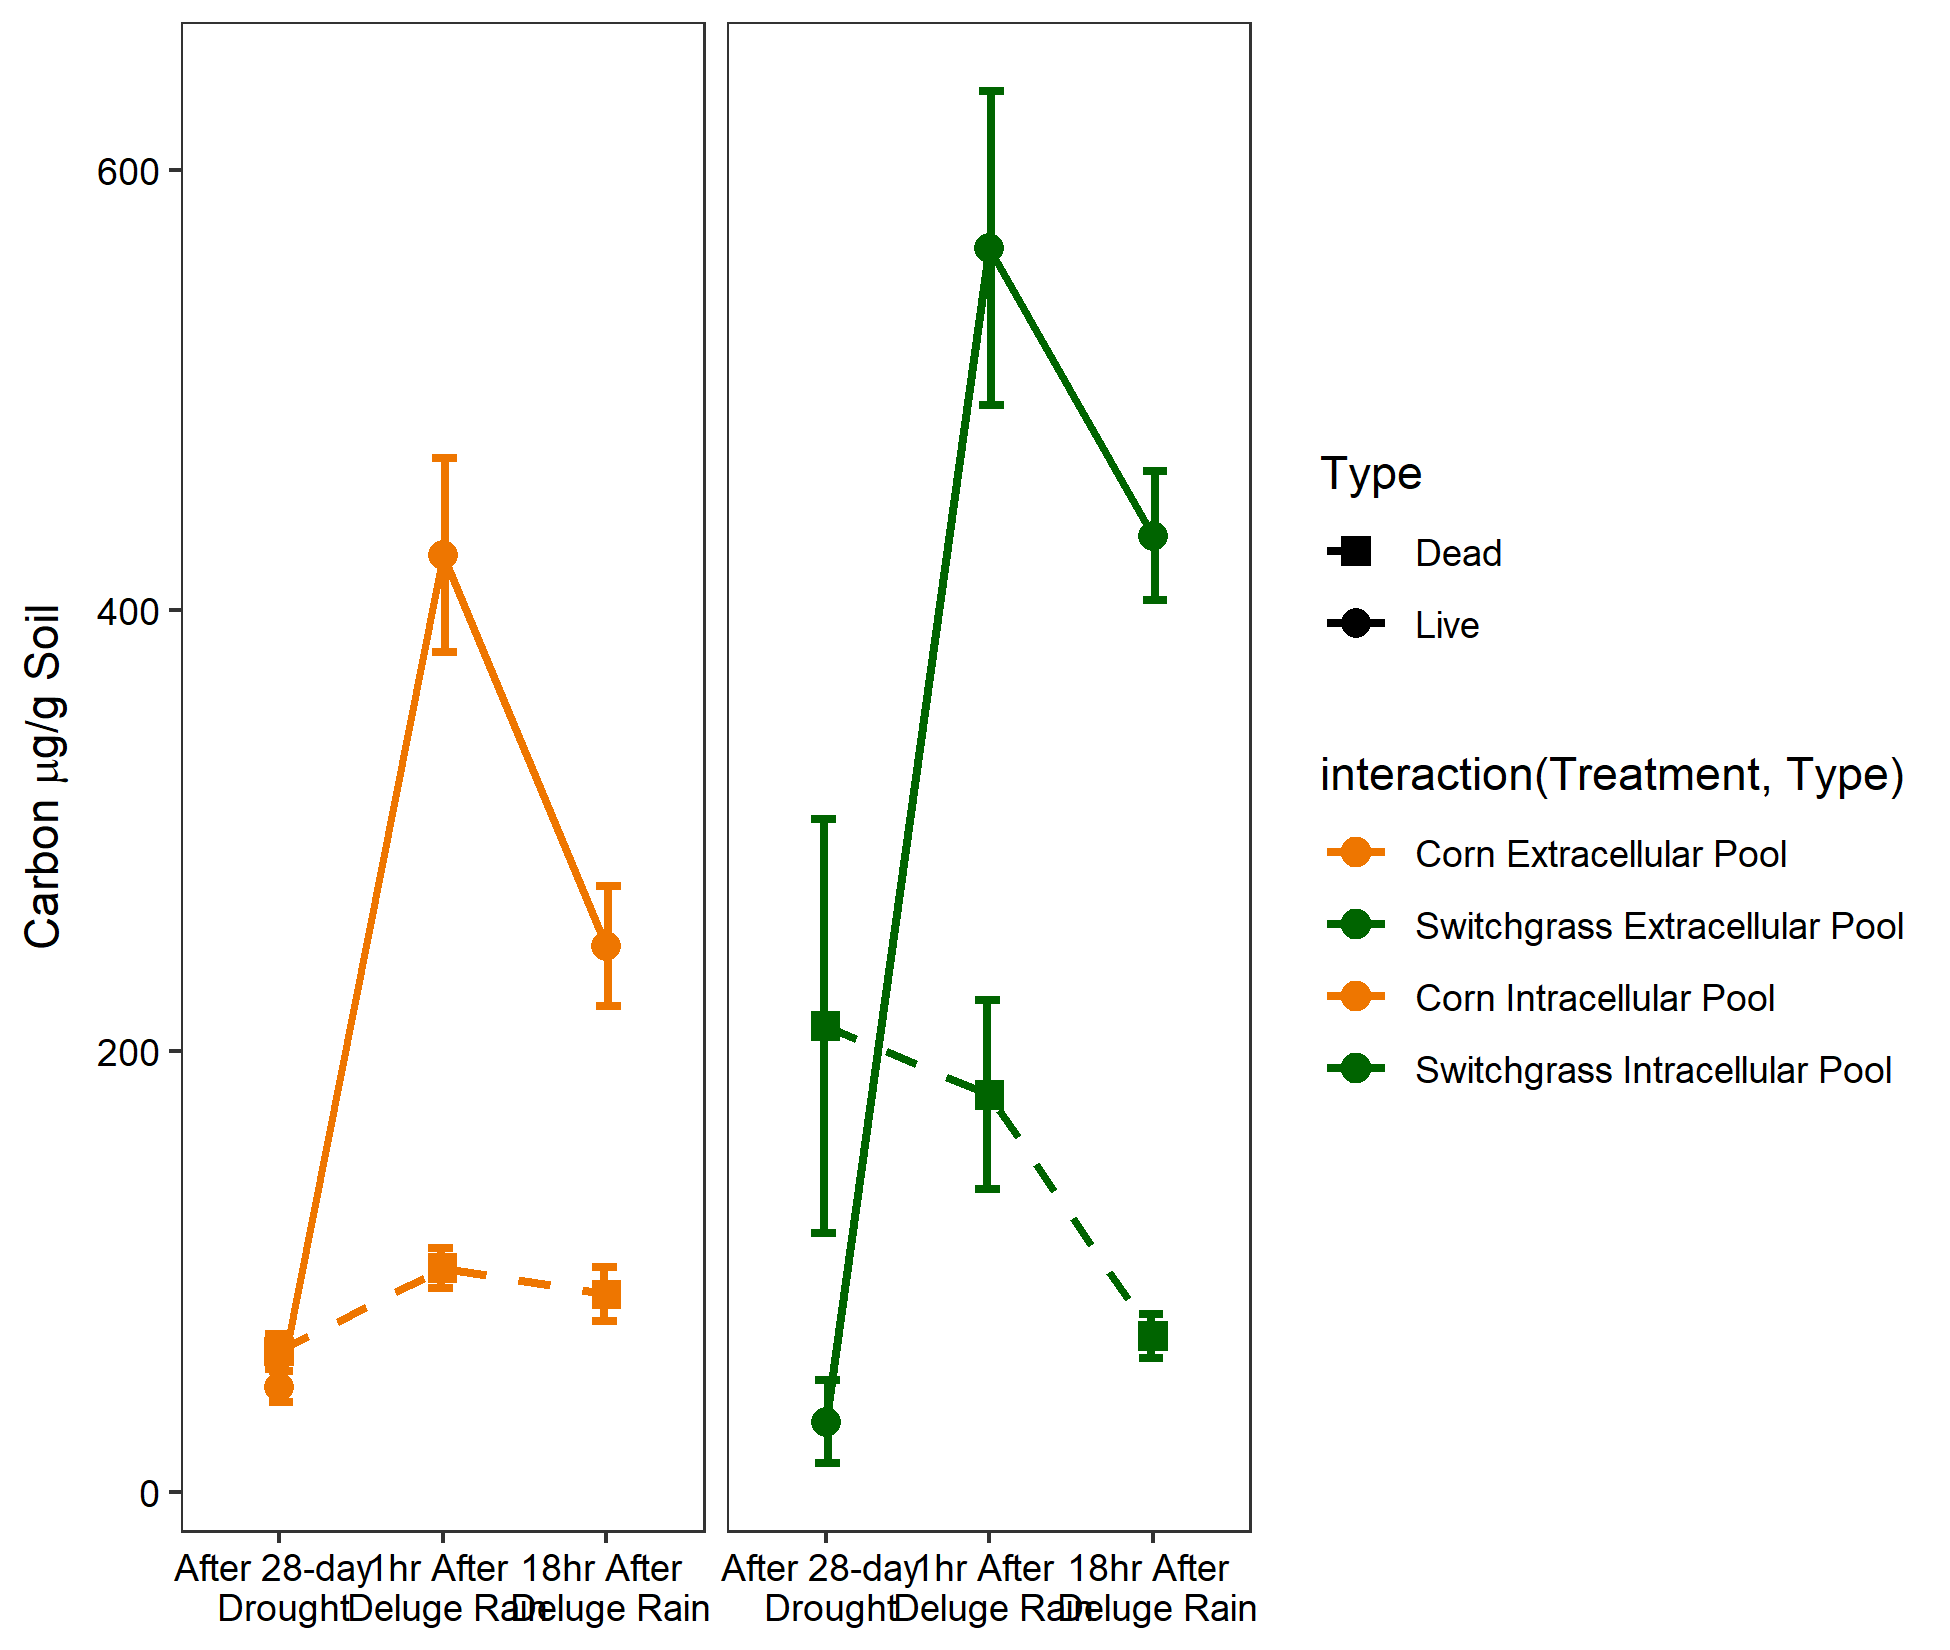

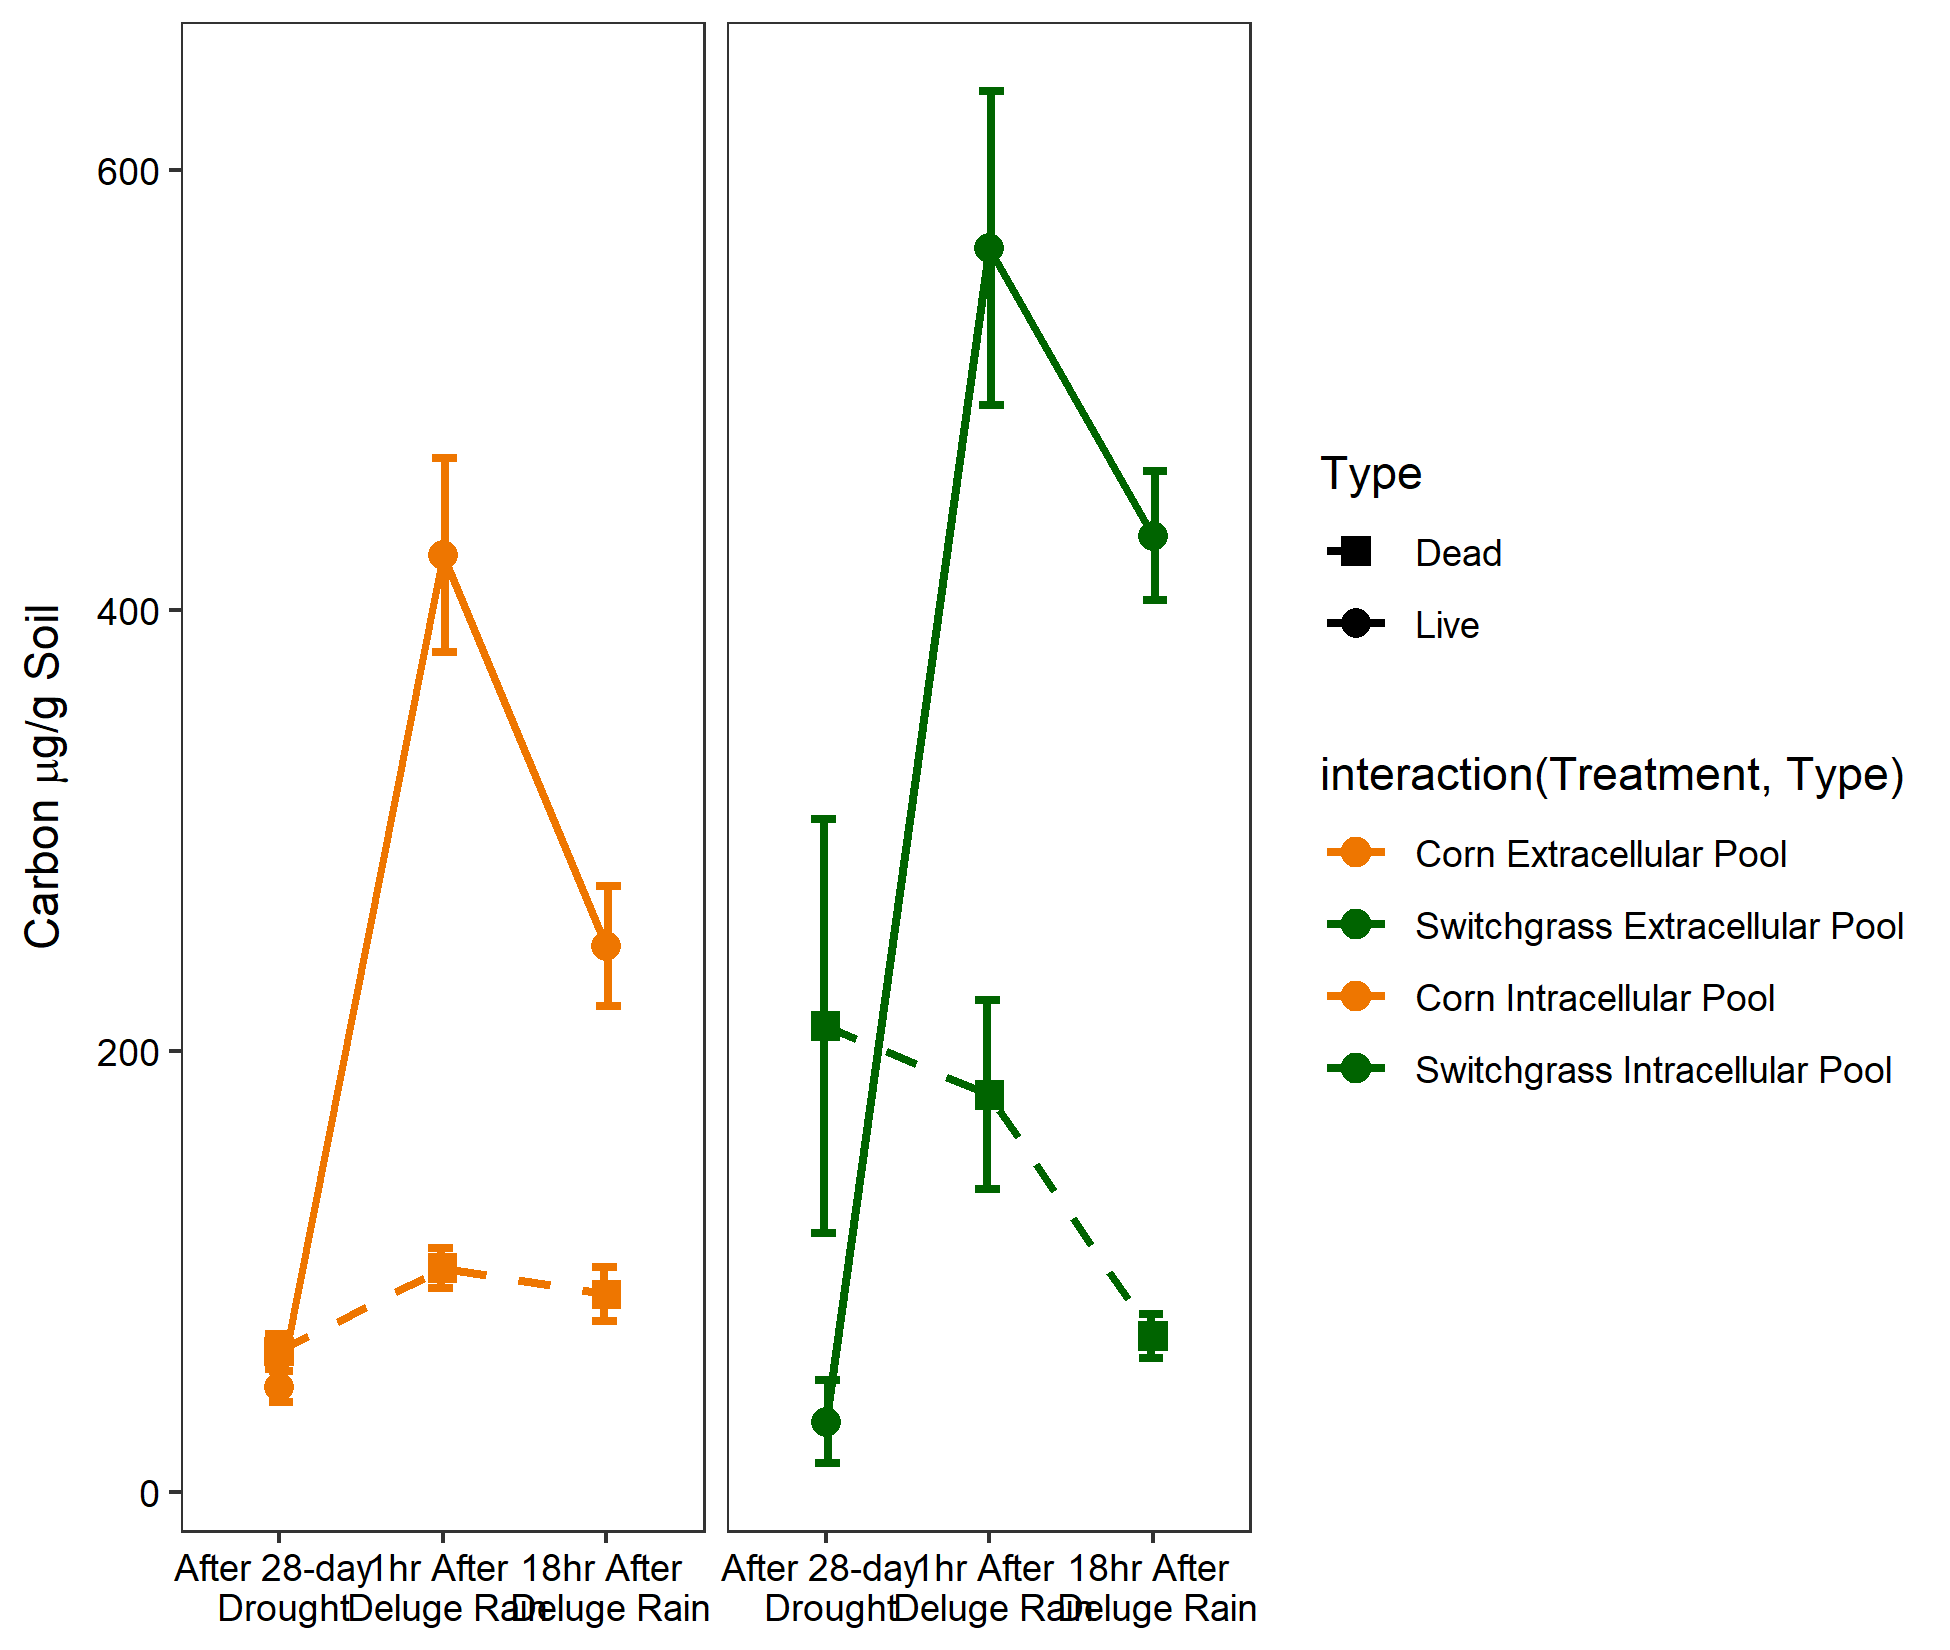

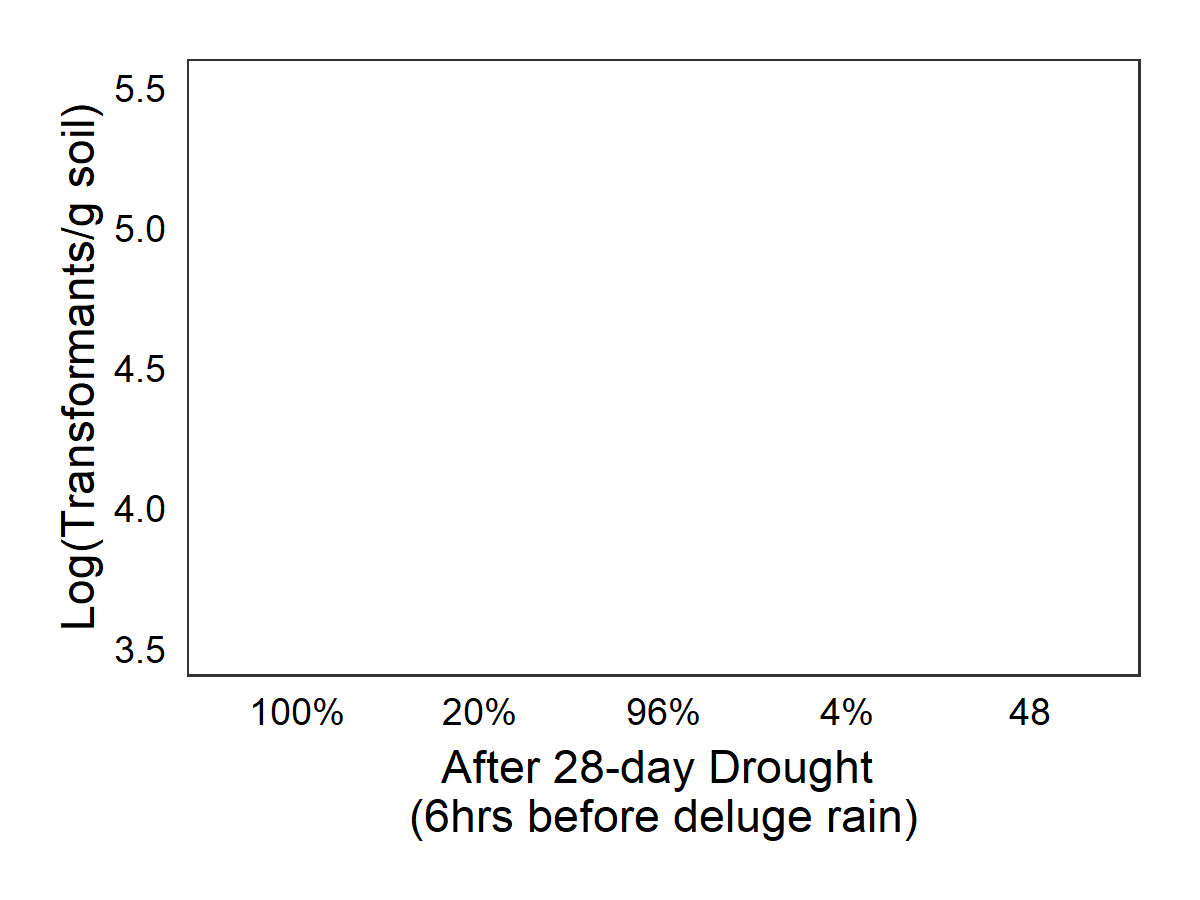

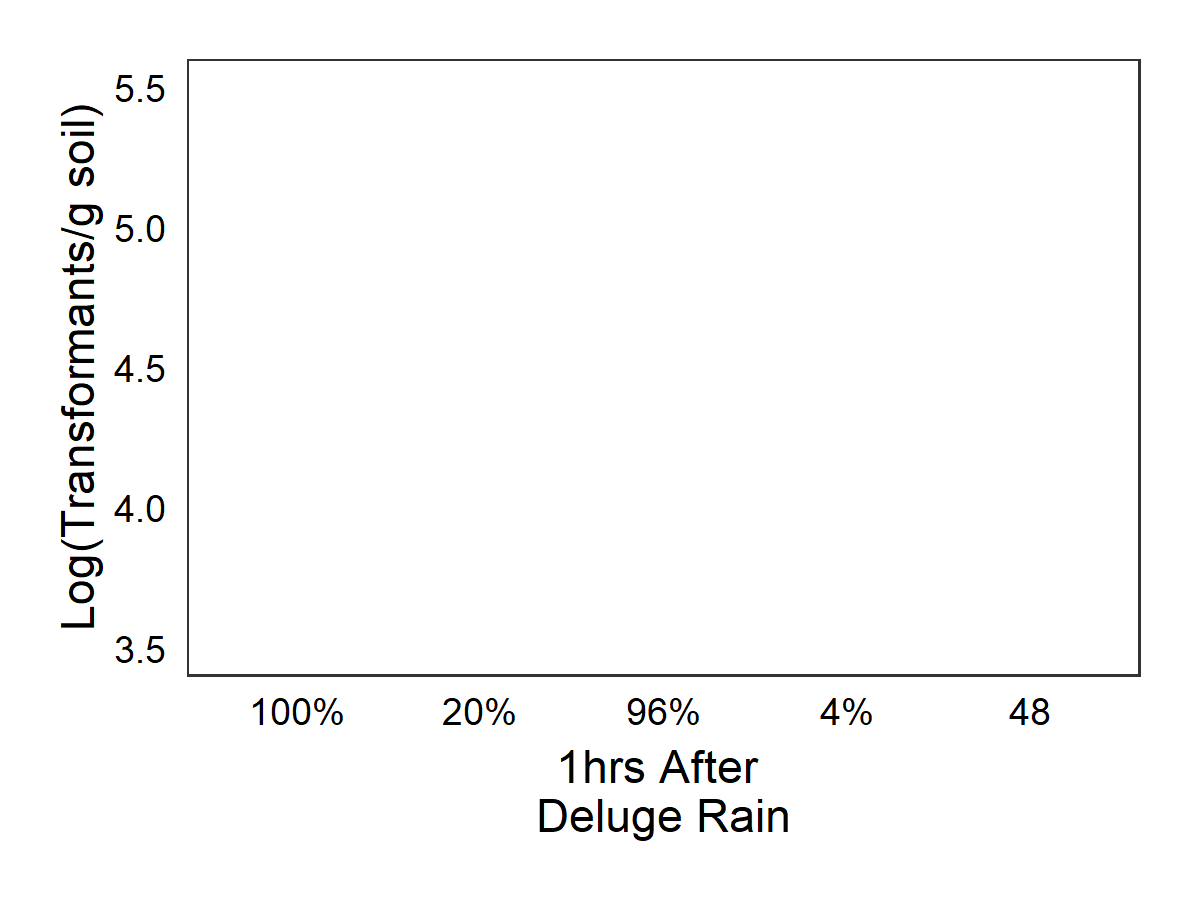

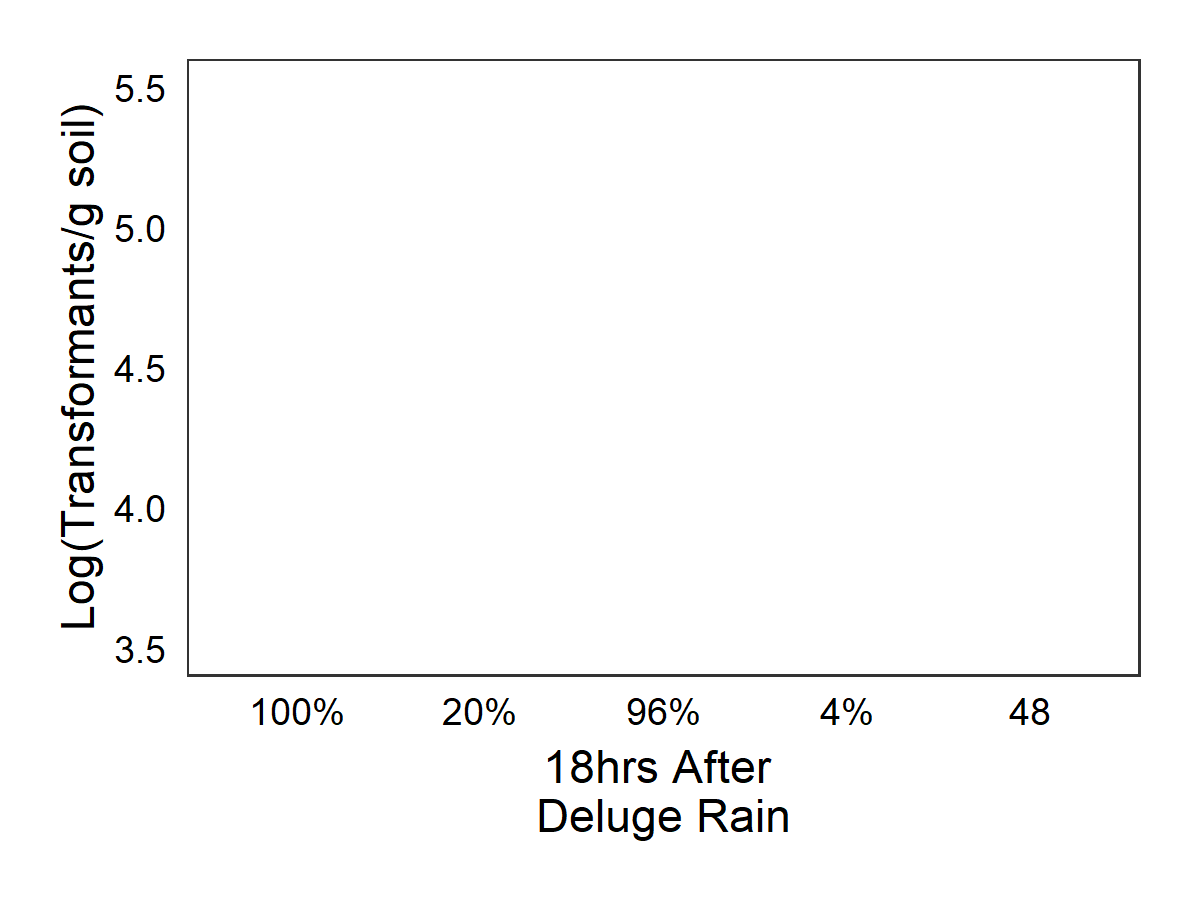

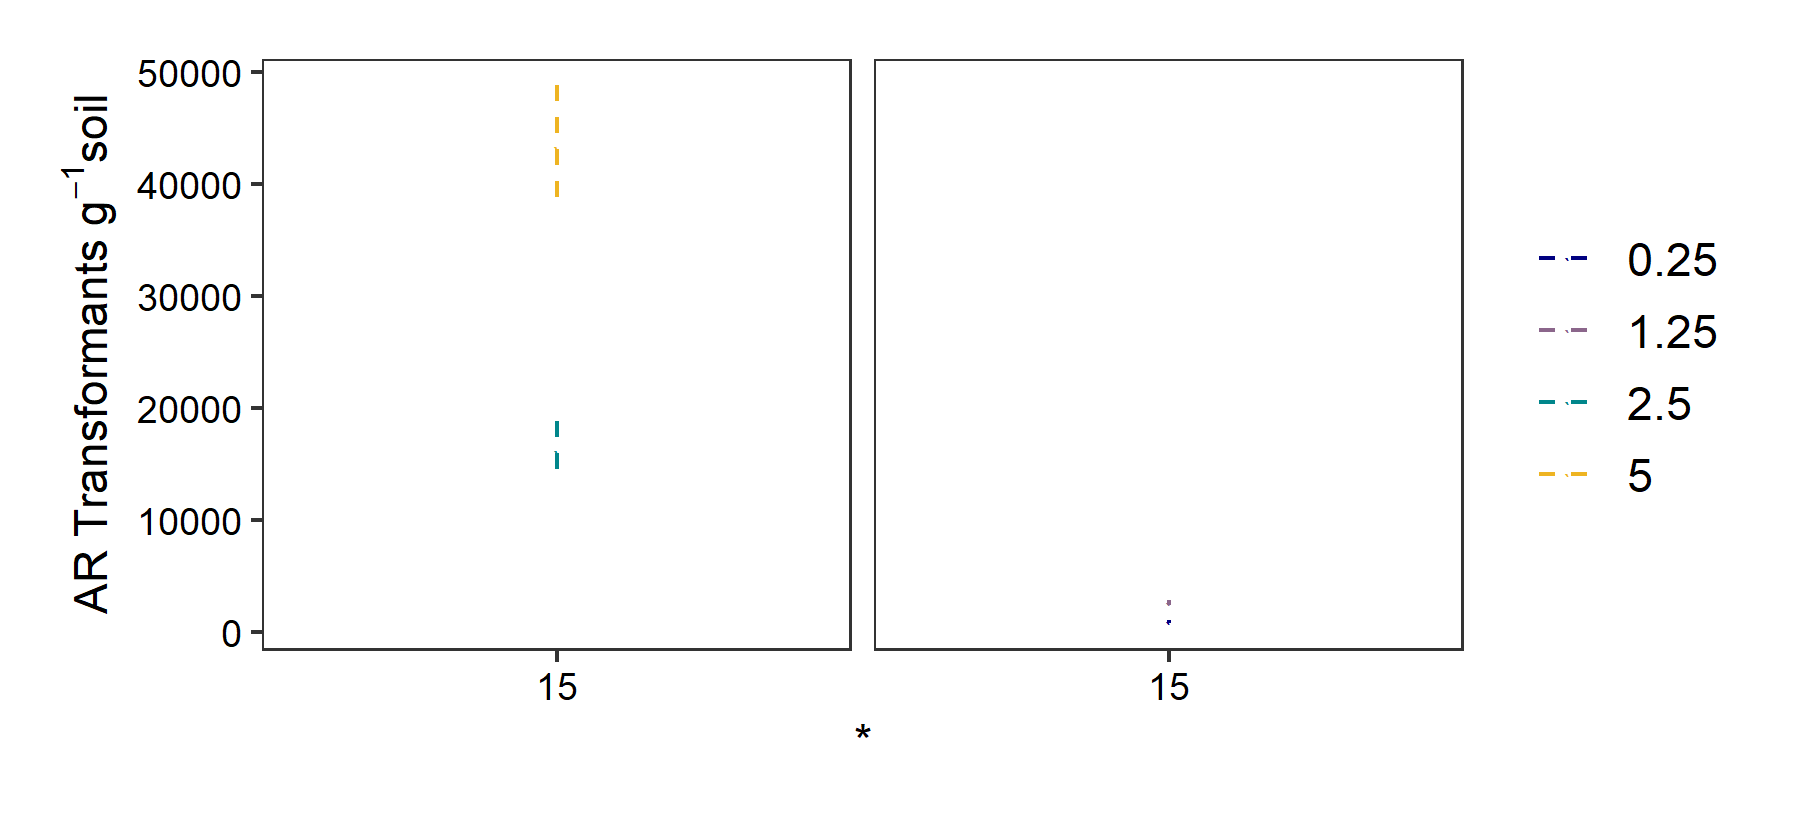

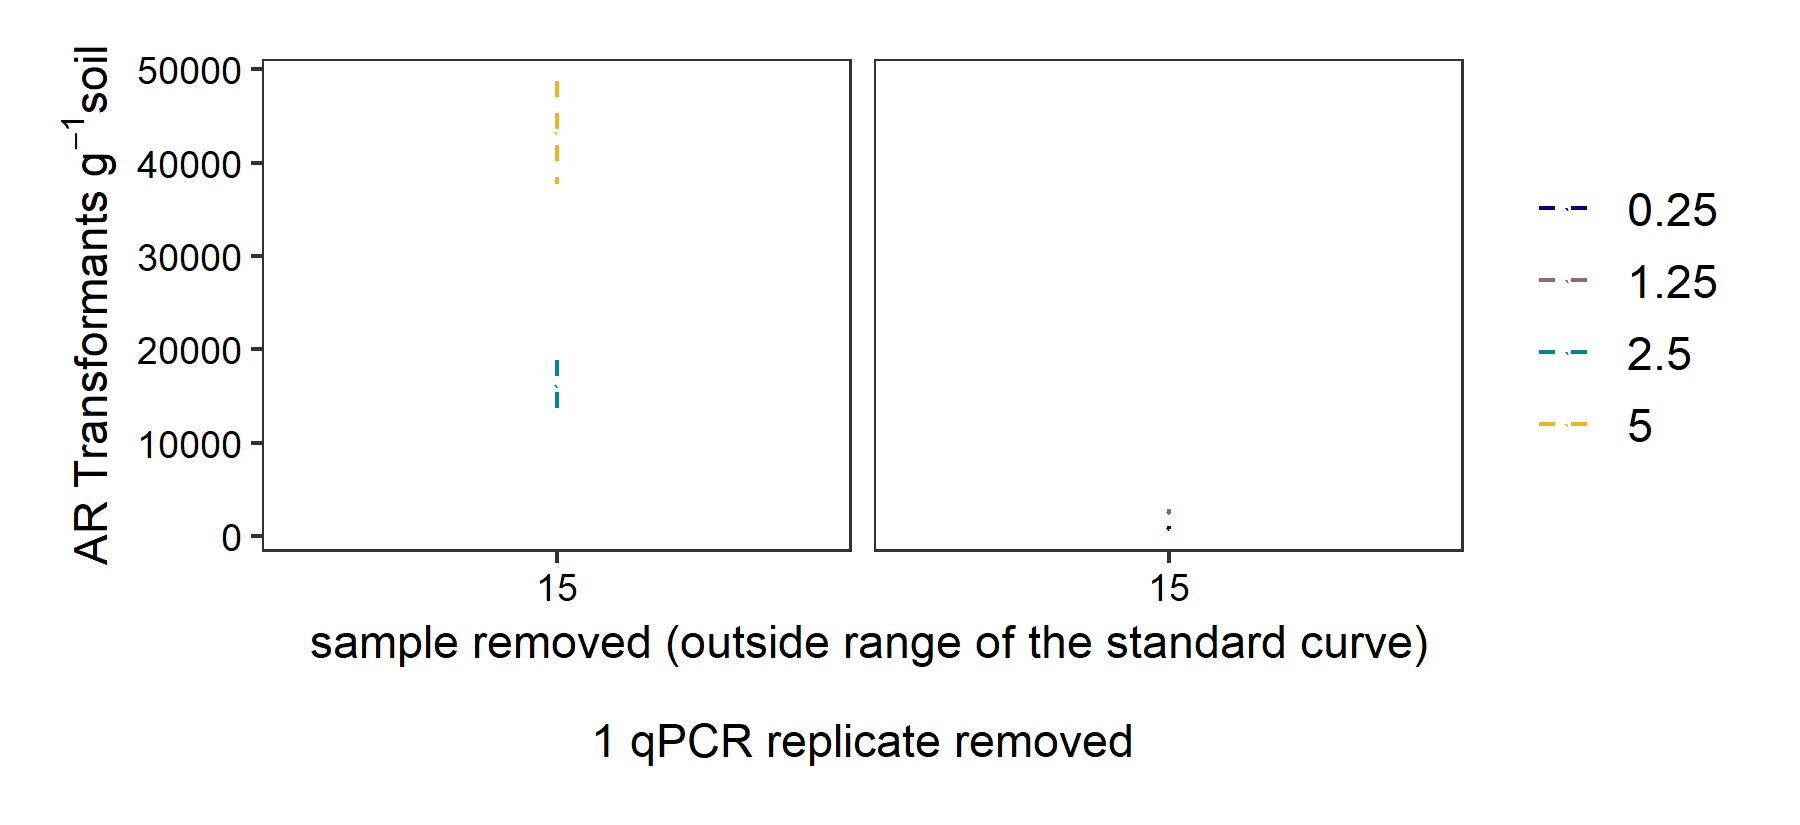

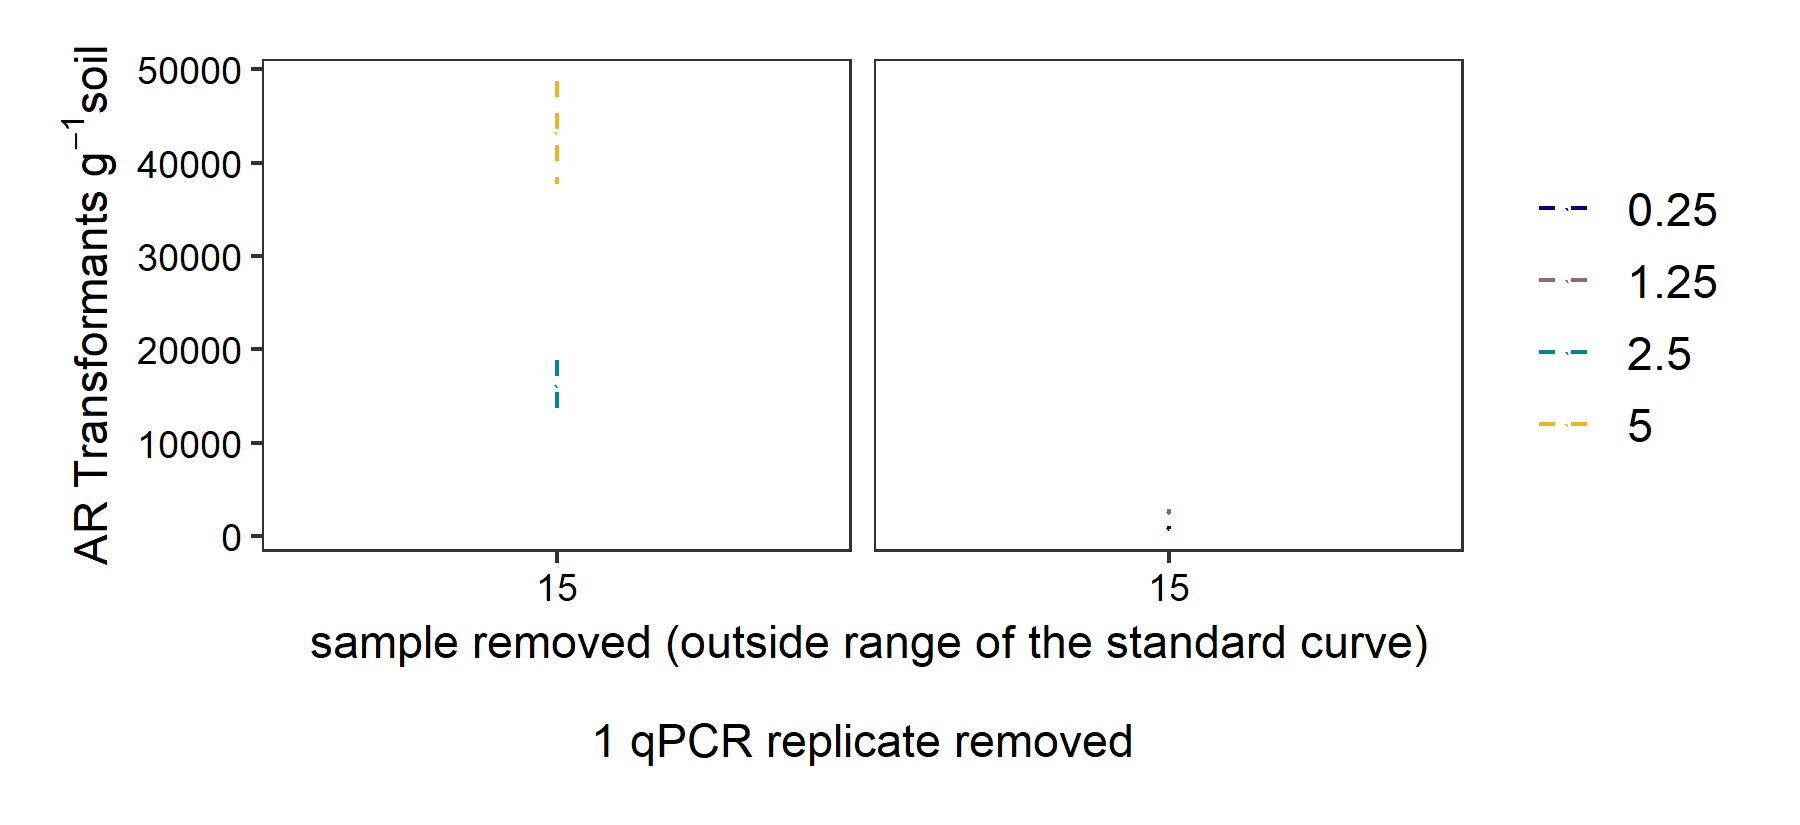

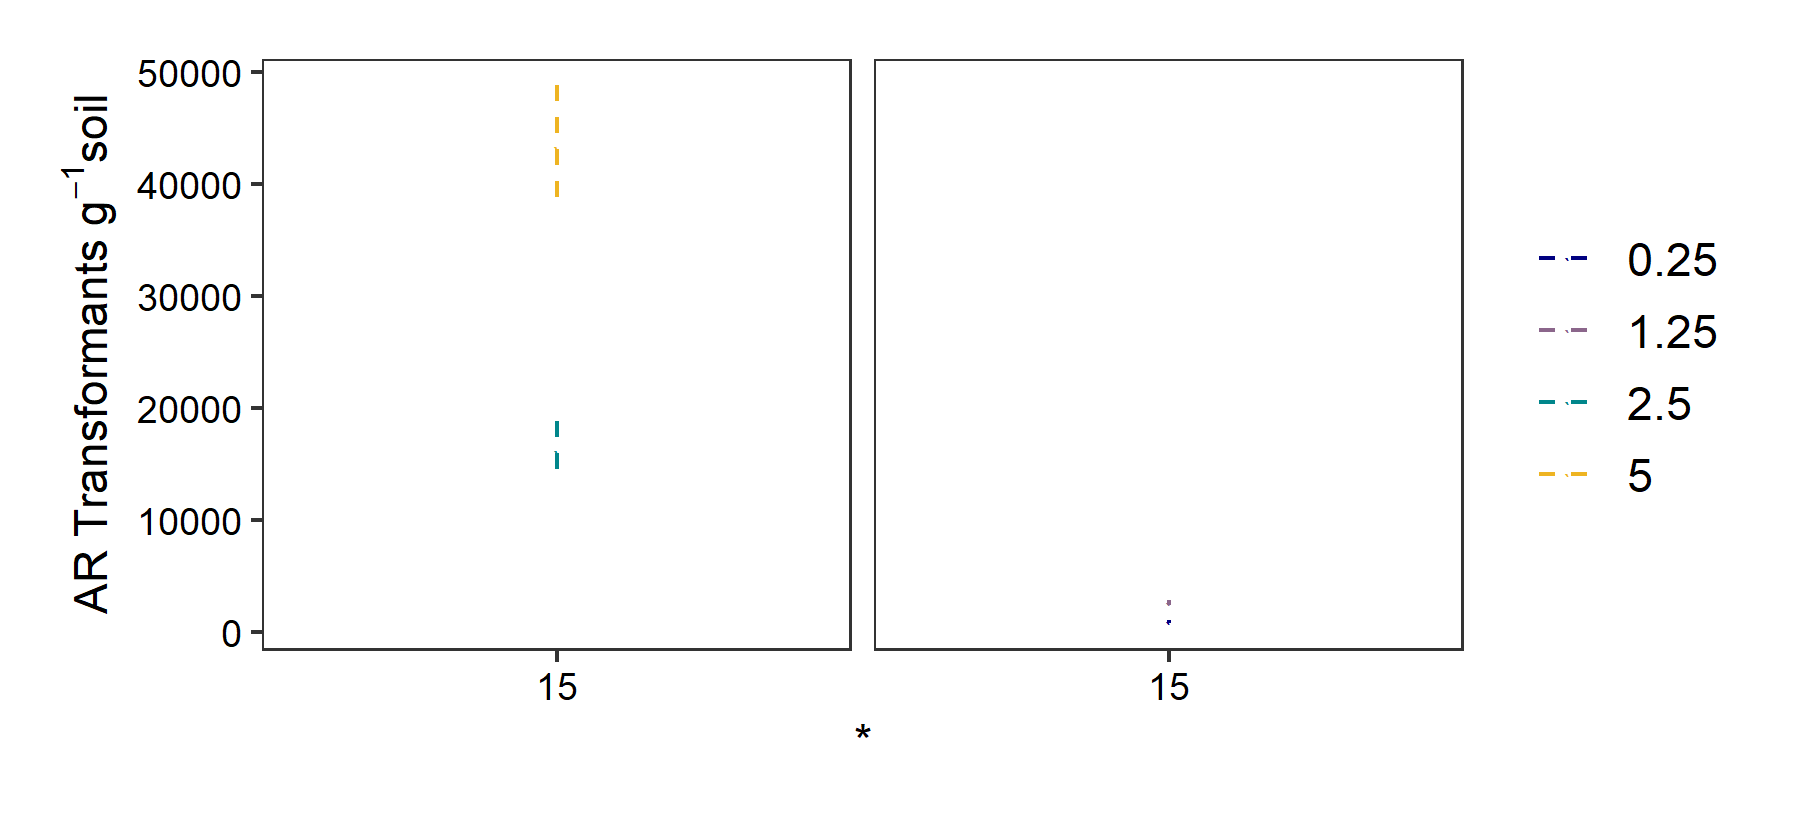

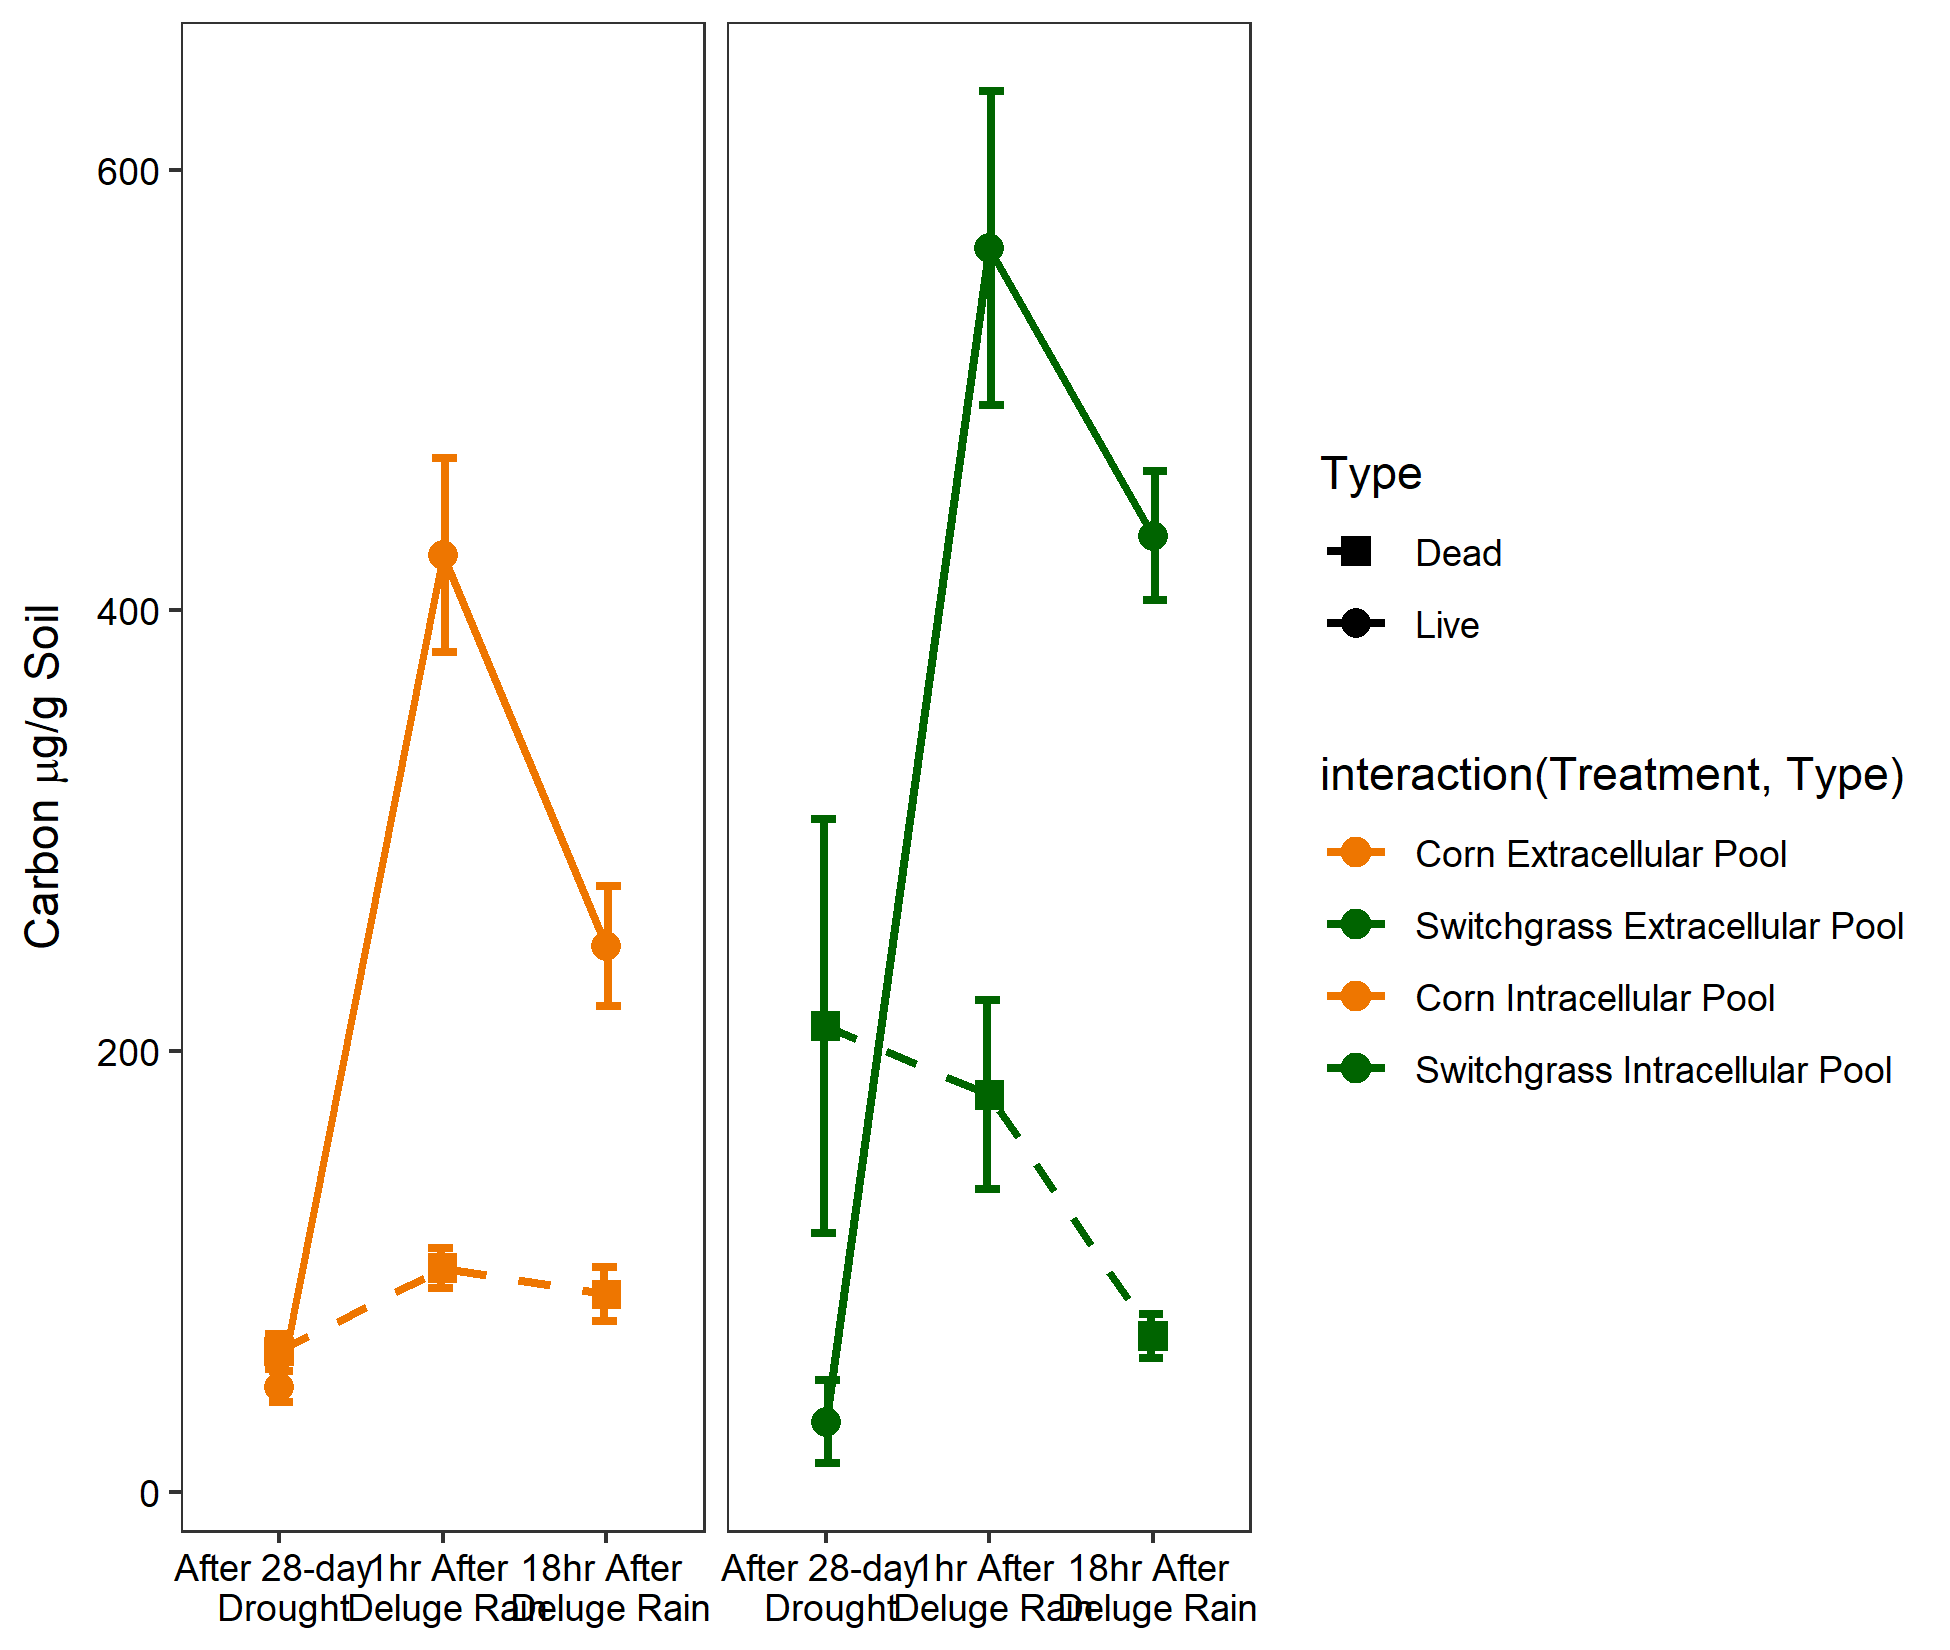

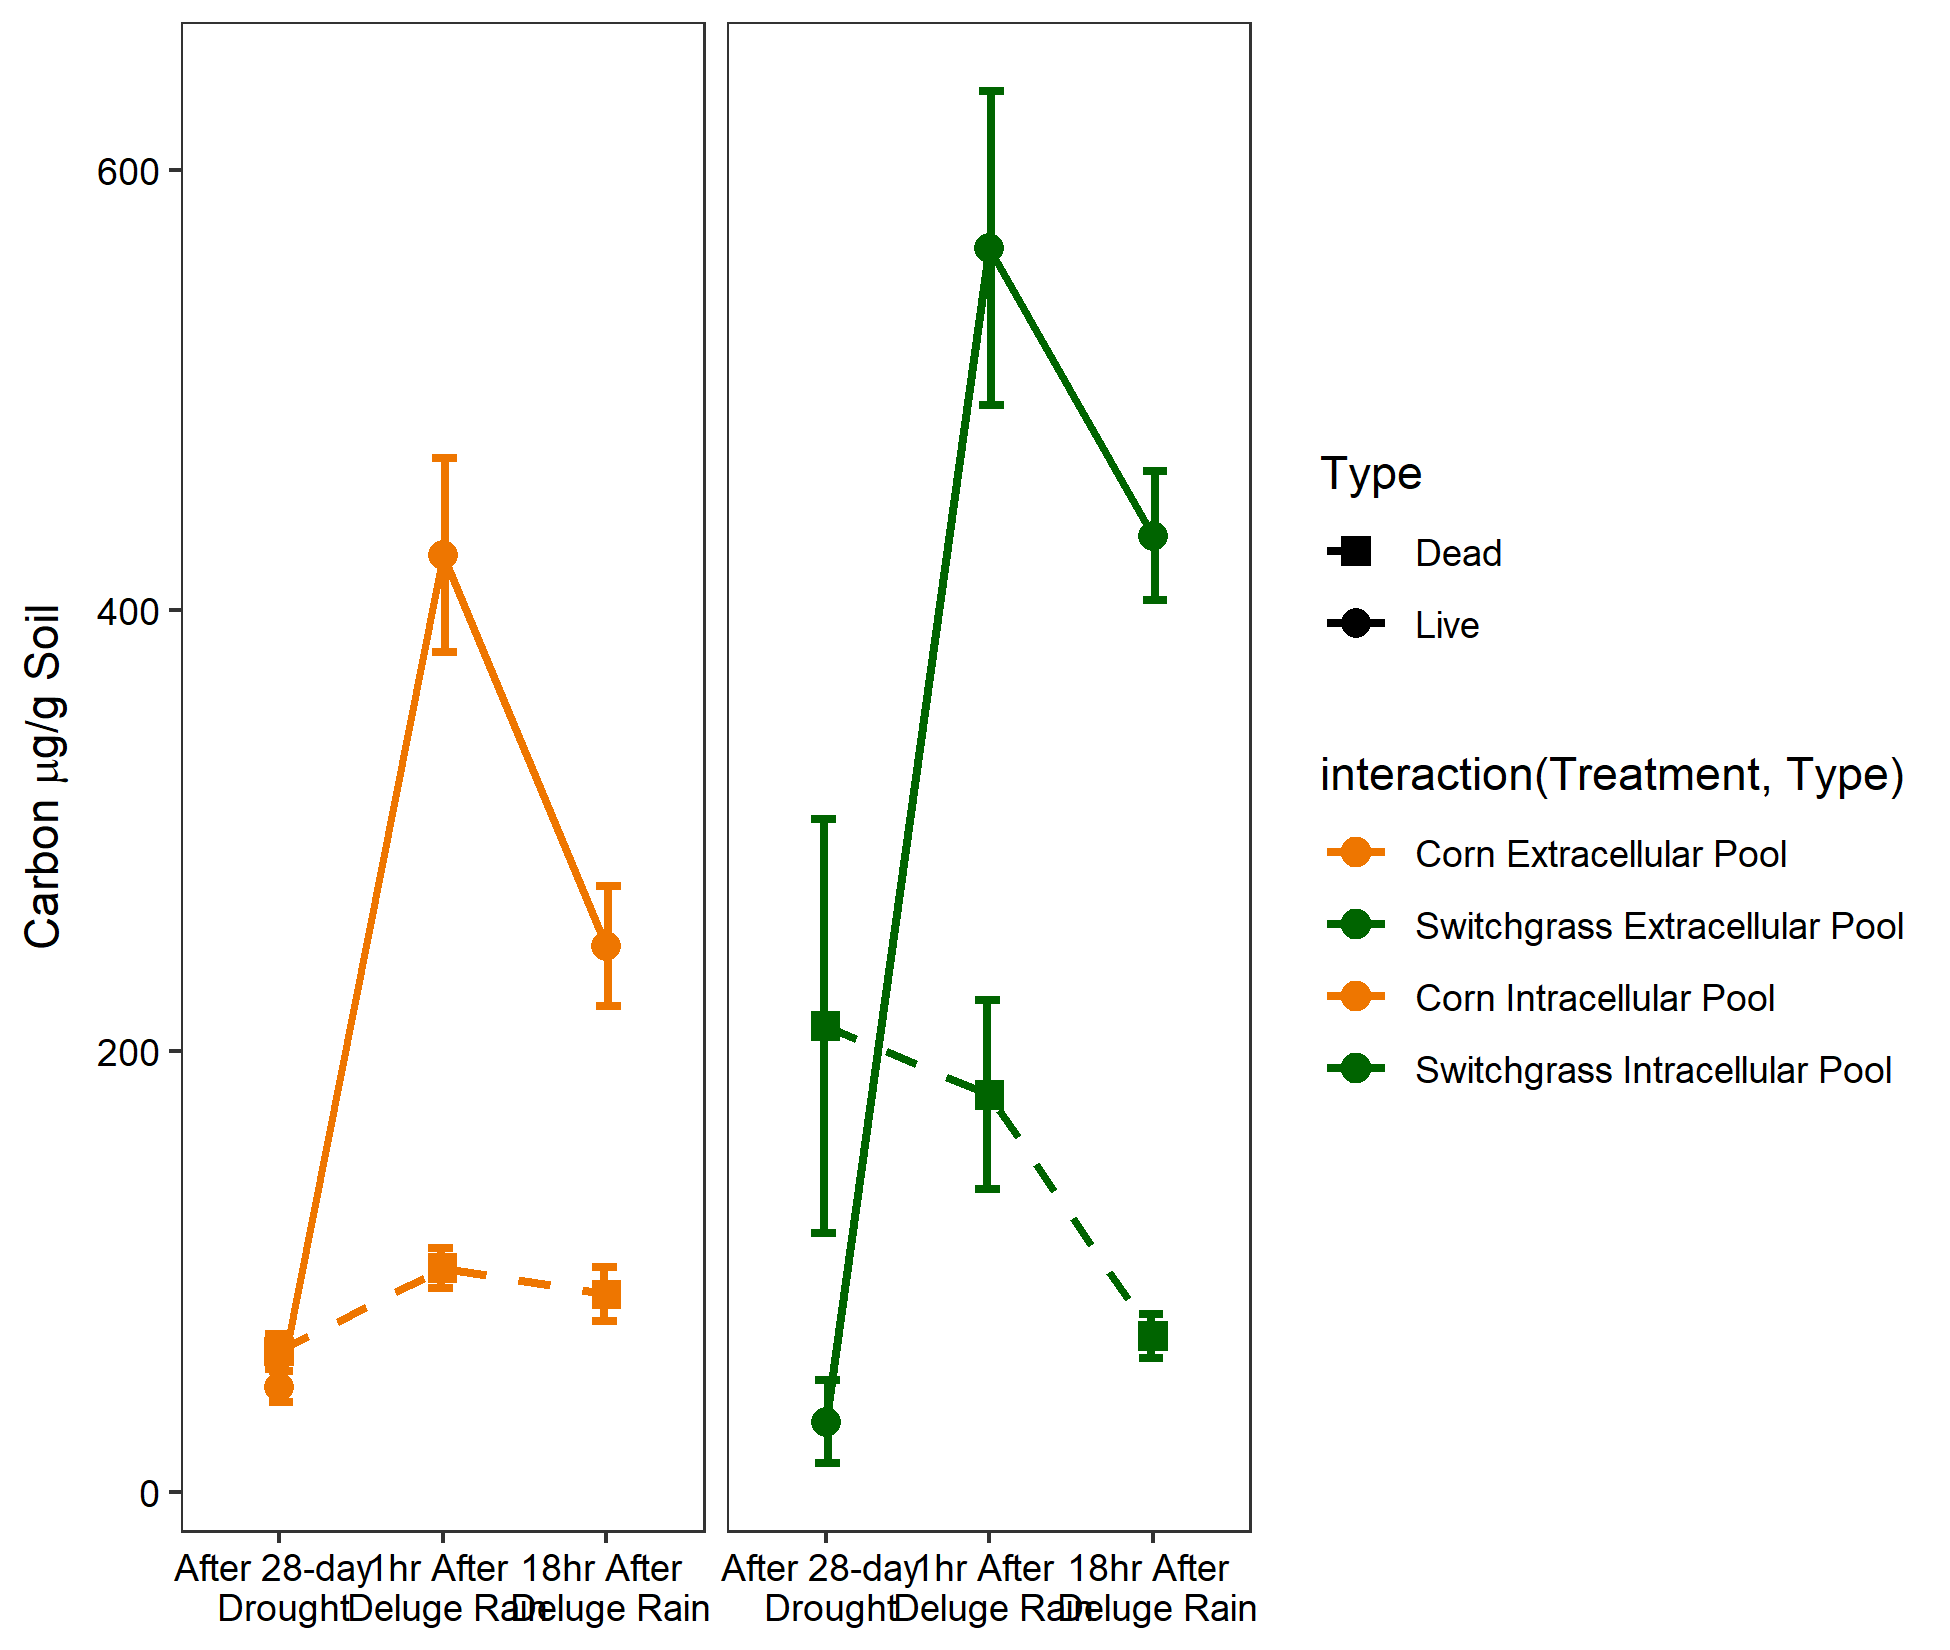

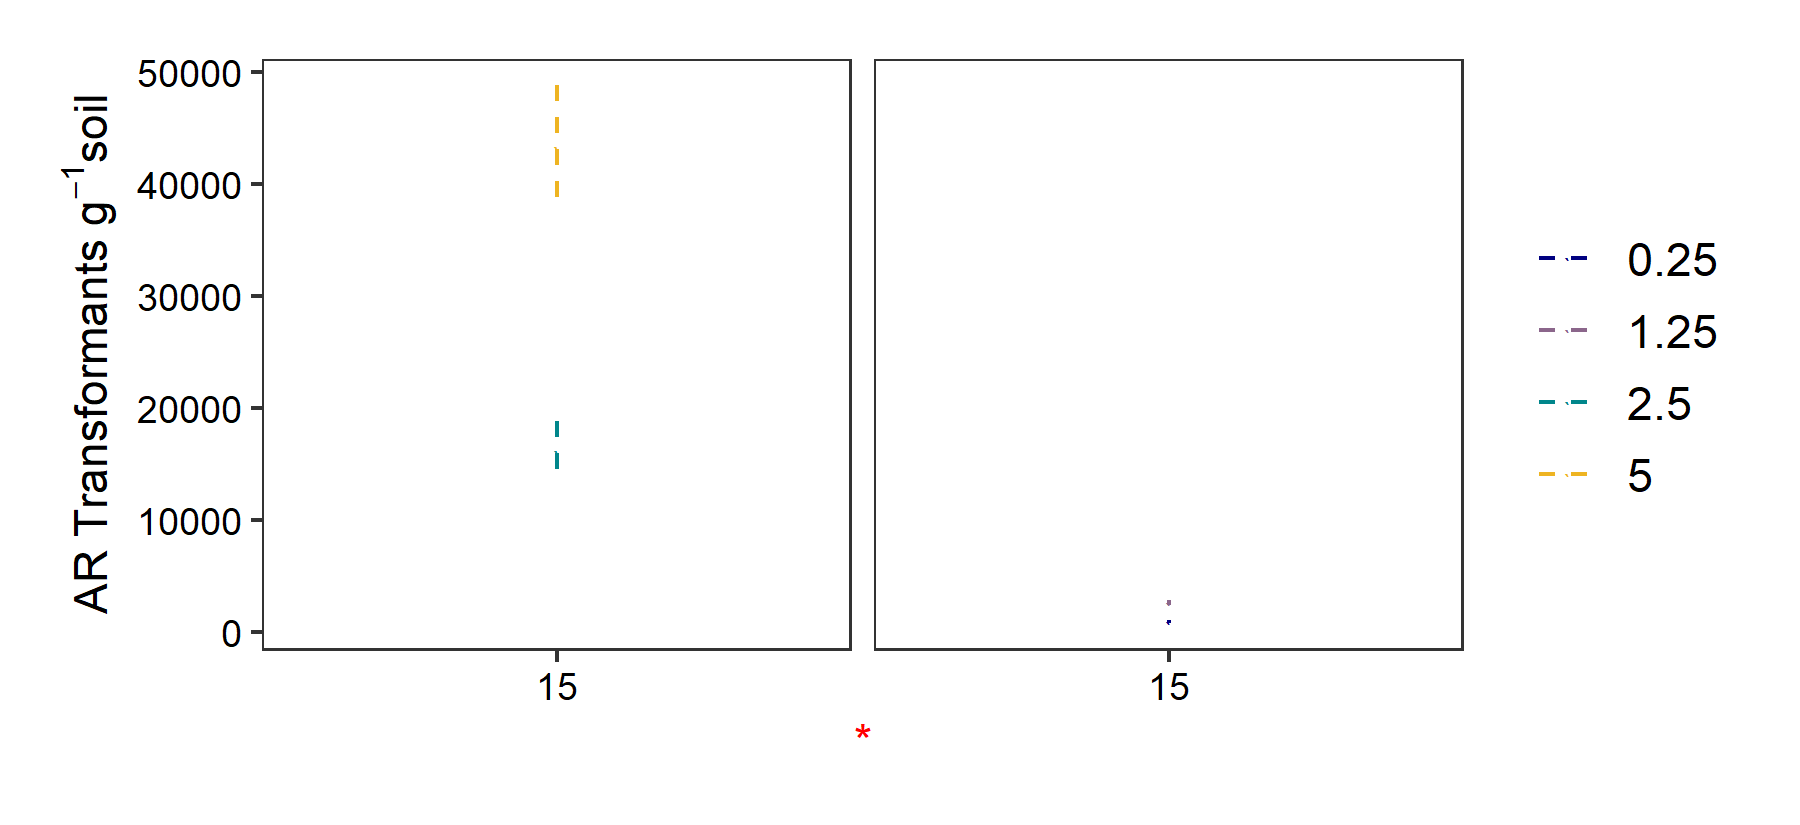

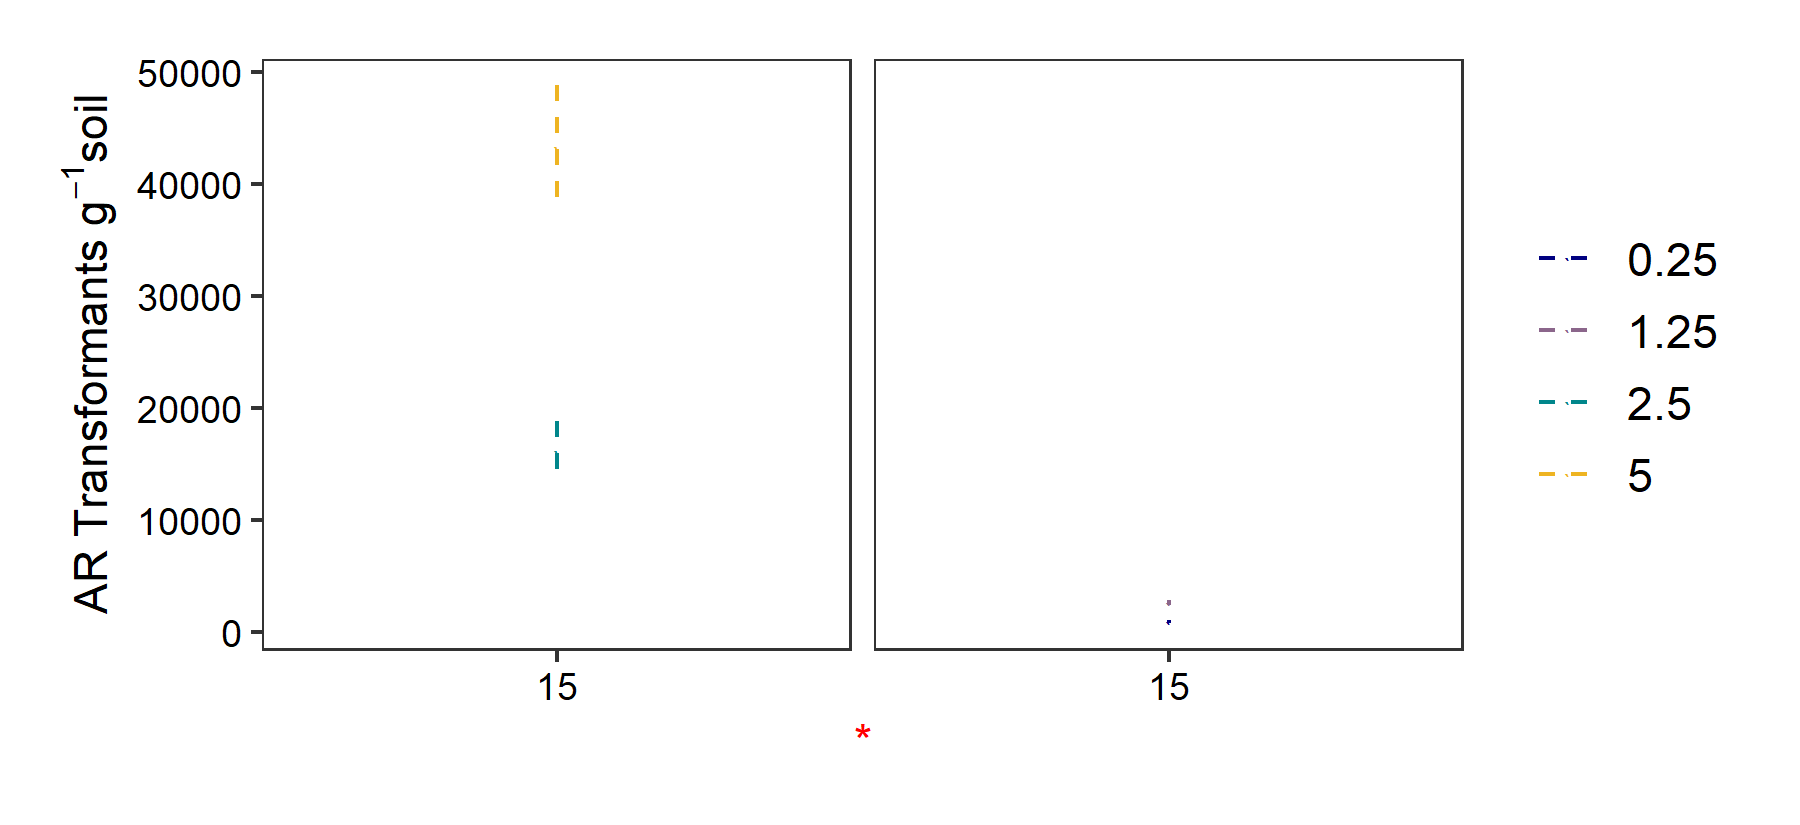

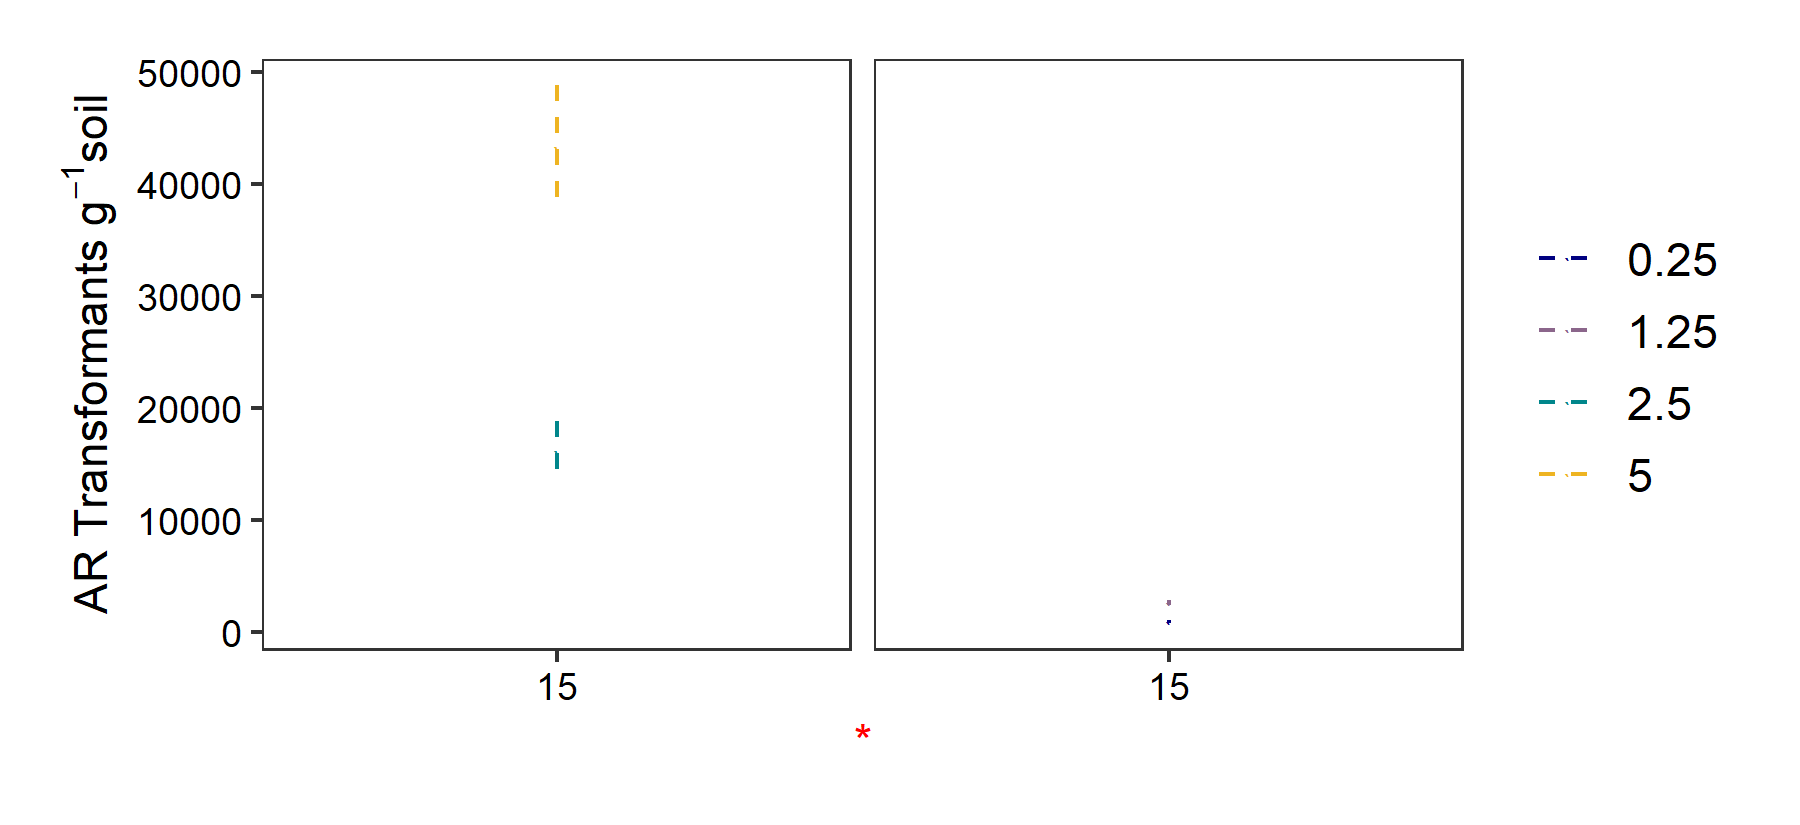


| **Taxa Driving Responses to Soil Rewetting** | |
| --- | --- |
| **(-) eDNA excluded** | **(+) eDNA included** |
| Corn Bulk Soil | |
| Mizugakiibacter | Mizugakiibacter |
| Sphingomonas | Thermosporotrichaceae |
| Thermosporotrichaceae | *Rhodanobacter* |
| Acidobacterium | Sphingomonas |
| Xanthomonadaceae | Acidobacterium |
| Bryobacter | Bryobacter |
| Bryobacter | *Chitinophagaceae* |
| Acidothermus | *Mizugakiibacter* |
| Sphingobium | *Chitinophagaceae* |
| Sphingomonas | *Castellaniella* |
| Deltaproteobacteria (GR_WP33-30) | Bryobacter |
| Xanthomonadaceae | *Acidobacteriaceae_[Subgroup_1]* |
| Acidobacteria (Subgroup_6) | *Acidobacteriaceae_[Subgroup_1]* |
| DA101_soil_group | *Acidobacteriaceae_[Subgroup_1]* |
| Sphingomonas | *Bradyrhizobium* |
| Switchgrass | |
| DA101_soil_group | *unclassified* |
| Sphingomonas | *Bradyrhizobium* |
| Holophagae | *Luteolibacter* |
| Nitrosomonadaceae | *Sphingomonas* |
| Acidobacteria (subgroup_4) | *Flavobacterium* |
| Acidobacteria (subgroup_4) | *Cellvibrio* |
| Acidobacteria (subgroup_4) | Acidobacteria (subgroup_12) |
| Acidobacteria (subgroup_12) | *Haliangium* |
| Sphingomonas | *Variibacter* |
| Haliangium | *Pseudomonas* |
| Acidobacteria (subgroup_6) | *Chloroflexi* |
| Reyranella | *Latescibacteria* |
| DA101_soil_group | *Acidobacteria (subgroup_6)* |
| Acidobacteria (subgroup_12) | DA101_soil_group |
| Acidobacteriaceae_[Subgroup_1] | DA101_soil_group |

**Table S1 |** The top 15 taxa driving changes in response to soil rewetting (timepoint t1 to t2) when eDNA is excluded and included in analyses. Taxa or OTUs that are “incorrectly” identified, that is, may be artifacts created by exDNA inclusion, are italicized.

**Methods S1**

**Supplementary site information**

We exposed soil bacterial communities to ambient drying rewetting (6.6mm of rain every 3 days) and extreme drying rewetting (80mm of rain every 28 days) between April 3rd and September 17th in experimental Biofuel Cropping System plots located at the U.S. Department of Energy’s Great Lakes Bioenergy Research Center (GLBRC) at the Kellogg Biological Station in Southwest, Michigan (42°23′47″N, 85°22′26″W, 288 m a.s.l.). On September 20th of 2017 we collected soil cores (10cm depth by 5cm diameter) from continuous corn (*Zea mays*) and continuous switchgrass (*Panicum virgatum,* variety “Cave-in-Rock”) plots at three-time points; 6-hrs before, 1-hr after, and 18-hrs after a rewetting event, which also coincided with the end of a 28-day drought. The soils are well-drained mesic Typic Hapludalfs developed from glacial till and outwash consisting of co-mingled Kalamazoo (fine-loamy, mixed, semiactive) and Oshtemo (coarse-loamy, mixed, active) series (Crum and Collins 1995) with intermixed loess (Luehmann et al. 2016). Bulk soil was brought back to the lab, sieved at <2mm and homogenized. Gravimetric soil moisture was determined on sieved soils dried at 60°C for 72 hrs. Soil moisture increased in response to the extreme rewetting event (**Fig. 2.1A**: Corn p<0.0001; Switchgrass p=0.035), while ambient rewetting had no effect on soil moisture (data not shown).

**Supplementary detail on exDNA removal**

Methods for quantifying eDNA were modified from Carini et al. [2]. Two DNA extractions were completed for each soil sample using the DNeasy PowerSoil kit from Qiagen (previously PowerSoil DNA Isolation Kit by MO BIO). A paired sample design was used where one DNA extraction tube was treated with the chemical propidium monoazide (PMAxx Dye, 20mM in H2O from Biotium) which prevents amplification of eDNA. The other DNA extraction was left untreated to quantify the total DNA pool – both tubes were treated identically through the PMAxx activation steps. For each soil sample, 0.50 grams of soil was weighed out and divided evenly between the two DNA extraction tubes (0.25 g each). Prior to loading soil into the DNA extraction tubes, we removed the bead beating beads from sample tubes – beads were removed for the steps involving light activation of PMAxx to prevent potential cell lysis. Then 500µl of the Powerbead solution (solution that comes in the tubes with the beads) was returned to the tube. In a dark room, 3µl of PMAxx was added to the 500µl of PowerBead Solution in the transparent bead beating tubes. Samples were homogenized for 1 minute and exposed to a 1000 W halogen light source for ten minutes while undergoing frequent homogenization ([1000-Watt Halogen Telescoping Twin Head Tripod Work Light](about:blank) in a tinfoil lined cabinet). After light exposure, we returned the Powerbeads and the remaining PowerBead solution (~250µl) to the DNA extraction tube. The DNA was then extracted according to manufacturer’s instructions, however, samples treated with PMAxx were handled in low light conditions – minimal ambient light from windows – to minimize the binding of PMAxx to DNA released during the DNA extraction. The concentration of PMAxx was selected for this experiment because it optimized eDNA removal at higher concentrations of eDNA in switchgrass soil. The aim of which was to capture an increase in eDNA associated with bacterial death after the rewetting disturbance, however, this also led to increased variation at lower eDNA concentrations (**Figure S1**). In addition, previous work showed that agricultural soils have low eDNA concentrations compared to deciduous or coniferous forest soils (Carini et al. 2016). Indicating future studies should optimize the PMAxx concentration to their specific study. However, we generally recommend using a higher concentration of PMAxx, but completing the DNA extraction in low light conditions or a dark room, as this improves the binding of PMAxx to eDNA while reducing the probability that excess PMAxx will bind to intracellular DNA that is released in the first step of the DNA extraction.

**Quantitative PCR (qPCR)**

We performed quantitative PCR in triplicate using 96-well plates on an Thermofischer thermocycler. We used 3 technical replicates for each PMA-treated and un-treated soil sample (**Fig. S1C**). The total reaction volume was 20 µl with the following reaction mixture: 1 µl of each F and R primer (515f/806r at 10mM), 10 µl of iQ SYBR Green 2X Supermix (BIO-RAD), 4 µl sterile water, and 4 µl template DNA. The cycling conditions Ire: 95 °C for 15 min, followed by 40 cycles of 95°C 30 s; 50 °C 30 s; 72 °C 30 s. We generated melting curves for each run to verify product specificity by increasing the temperature from 60-95°C. Reactions were compared to standard curves developed using purified *Pseudomonas stutzeri* *28a24* genomic DNA. For all qPCR reactions the linear relationship between the log of the copy number and the threshold cycle value was reported at R2 > 0.99. Outlier analysis was performed on qPCR replicates. We removed qPCR replicates that were 2 cycles above or below the other two replicates – this resulted in the removal of 1 qPCR replicate from 3 samples (samples 2_PMA, 6_Total and 42_PMA in **Fig. S1C** (denoted by *)). Two soil samples with >60% eDNA were removed from the third time point analysis in both corn and switchgrass soil as they fell outside of the standard curve and were biologically inaccurate (sample 34 and 44, highlighted with gray bars in **Fig. S1C**). Across the entire data set, variation is higher in untreated soil samples than in PMA-treated soil samples (**Fig S1B**).

**Amplicon sequencing and bioinformatics**

We characterized bacterial communities using high throughput barcoded sequencing on the Illumina MiSeq platform at the Research Technology Support Facility (RTSF) Genomics Core at Michigan State University. Sequencing was done in a 2 × 250 bp paired end format using a MiSeq v2 500 cycle reagent cartridge. The V4 hypervariable region of the 16S rRNA gene was amplified using dual-index, Illumina compatible primers 515F and 806R as described in Kozich et al. [3]. Completed libraries were normalized using Invitrogen SequalPrep DNA Normalization plates, then pooled and cleaned up using AmpureXP magnetic beads. The 16S reads were quality filtered and merged using the USEARCH pipeline ([http://drive5.come/usearch/](about:blank)) and Cutadapt was used to remove primers and adapter bases before reads were filtered and truncated to 250 bp. OTUs were clustered at the 97% sequence identity level and classified using UPARSE. Two samples with low read number were removed, making the lowest read number 7723. Singletons, chloroplasts, and mitochondria were removed (312 total) resulting in 15,062 bacterial OTUs and 2,259,918 reads across all samples. All analyses were performed and visualized using bacterial counts that did not undergo rarefaction [4].

**Statistical analysis**

We tested for differences among univariate response variables (e.g. soil moisture, Shannon diversity, and bacterial abundance or number of 16S rRNA gene copies) using Type III sum of squares ANOVA with a post-hoc Tukey HSD correction test (p < 0.05) using the lme4 and agricolae packages. For all analyses we report the average value across the four field replicates, with the exception of the qPCR data, where we first calculated the number of 16S rRNA gene copies for each technical replicate (n=3 qPCR replicates, **Fig. S1C**). We calculated the percent eDNA by subtracting the number of 16S rRNA gene copies in the live fraction from the total number of copies, and then dividing by the total number of copies [(Total-Live)/(Total)*100].

We compared statistical differences in bacterial community composition using permutational analysis of variance (PerMANOVA) (9999 permutations) on weighted Unifrac distance matrices (Bray-Curtis distance) using the Adonis function in the vegan R package. We visualized community composition using Non-metric multidimensional scaling (NMDS) using phyloseq and ggplot2. We examined the proportion of taxa present in both the living community and eDNA pool using the Venn Diagram function in R. To assess shared membership in the eDNA pool we performed a Venn Diagram analysis on each field replicate and calculated the mean proportion of taxa specific to the eDNA pool at each time point. We used the proportion of taxa in this analysis instead of the raw number of taxa to account for changes in the total number of taxa. To estimate the effect of eDNA removal relative to untreated soil samples, we calculated standardized effect sizes according to biascorrected Hedges’ g∗ values [1] using the effsize package in R.

References cited

1. Hedges L V., Olkin I (1984) Nonparametric estimators of effect size in meta-analysis. Psychol Bull 96:573–580. https://doi.org/10.1037/0033-2909.96.3.573

2. Carini P, Marsden PJ, Leff JW, et al (2016) Relic DNA is abundant in soil and obscures estimates of soil microbial diversity. Nat Microbiol 2:. https://doi.org/10.1038/nmicrobiol.2016.242

3. Kozich JJ, Westcott SL, Baxter NT, et al (2013) Development of a dual-index sequencing strategy and curation pipeline for analyzing amplicon sequence data on the miseq illumina sequencing platform. Appl Environ Microbiol 79:5112–5120. https://doi.org/10.1128/AEM.01043-13

4. McMurdie PJ, Holmes S (2014) Waste Not, Want Not: Why Rarefying Microbiome Data Is Inadmissible. PLoS Comput Biol 10:. https://doi.org/10.1371/journal.pcbi.1003531
